1

2

3 The BRCA1-BARD1 complex associates with the synaptonemal complex and pro-crossover  
4 factors and influences RAD-51 dynamics during *Caenorhabditis elegans* meiosis

5

6

7 Eva Janisiw<sup>1,2</sup>, Maria Rosaria Dello Stritto<sup>1</sup>, Verena Jantsch<sup>1</sup> and Nicola Silva<sup>1\*</sup>

8

9

10 <sup>1</sup>Department of Chromosome Biology, Max F. Perutz Laboratories, University of Vienna,  
11 Vienna BioCenter, 1030 Vienna, Austria.

12

13 <sup>2</sup>Present address: Centre for Anatomy and Cell Biology, Medical University of Vienna, 1090  
14 Vienna, Austria.

15

16

17 \* Corresponding author

18 E-mail: [nicola.silva@univie.ac.at](mailto:nicola.silva@univie.ac.at)

19

20

21

22 Short title: BRCA1-BARD1 interact with the synaptonemal complex and crossover factors

23 Key words: *C. elegans* meiosis, BRC-1, BRD-1, DNA damage, meiotic DNA repair

24 **Abstract**

25 During meiosis, the maternal and paternal homologous chromosomes must align along their  
26 entire length and recombine to achieve faithful segregation in the gametes. Meiotic  
27 recombination is accomplished through the formation of DNA double-strand breaks, a subset  
28 of which can mature into crossovers to link the parental homologous chromosomes and  
29 promote their segregation. Breast and ovarian cancer susceptibility protein BRCA1 and its  
30 heterodimeric partner BARD1 play a pivotal role in DNA repair in mitotic cells; however,  
31 their functions in gametogenesis are less well understood. Here we show that localization of  
32 BRC-1 and BRD-1 (*Caenorhabditis elegans* orthologues of BRCA1 and BARD1) is dynamic  
33 during meiotic prophase I; they ultimately becoming concentrated at regions surrounding the  
34 presumptive crossover sites, co-localizing with the pro-crossover factors COSA-1, MSH-5  
35 and ZHP-3. The synaptonemal complex is essential for BRC-1 loading onto chromosomes  
36 but recombination is not. BRC-1 forms an in vivo complex with the synaptonemal complex  
37 component SYP-3 and the crossover-promoting factor MSH-5. Furthermore, BRC-1 is  
38 essential for efficient stage-specific recruitment of the RAD-51 recombinase to DNA damage  
39 sites when synapsis is impaired and upon induction of exogenous DNA double-strand breaks.  
40 Taken together, our data provide new insights into the localization and meiotic function of  
41 the BRC-1–BRD-1 complex and highlight their essential role in DNA double-strand break  
42 repair during gametogenesis.

43

## 44 **Author summary**

45 Sexually reproducing species rely on meiosis to transmit their genetic information across  
46 generations. Parental chromosomes (homologues) undergo many distinctive processes in  
47 their complex journey from attachment to segregation. The physiological induction of DNA  
48 double strand breaks is crucial for promoting correct chromosome segregation: they are  
49 needed to activate the DNA repair machinery responsible for creating physical connections,  
50 or crossovers (COs), between the homologues. In turn, crossovers promote the accurate  
51 segregation of the chromosomes in daughter cells. The BRCA1–BARD1 complex has a  
52 pivotal role during DNA repair in somatic cells and is exclusively located on unaligned  
53 chromosomal regions during mammalian meiosis. We show that in *Caenorhabditis elegans*,  
54 BRCA1 and BARD1 localize to chromosomes at all stages of meiotic prophase I and are  
55 enriched at presumptive crossover sites. We found that BRCA1 promotes DNA loading of  
56 the repair factor RAD-51 in specific mutant backgrounds and upon exogenous damage  
57 induction. Our data provide evidence for a direct physical association between BRCA1 and  
58 pro-crossover factors (including the synaptonemal complex) and identify an important role  
59 for BRCA1 in stimulating meiotic DNA repair. Further studies are necessary to identify the  
60 substrates acted upon by BRCA1–BARD1 complex to maintain genome stability in the  
61 gametes.

62

## 63 **Introduction**

64 The genetic information encoded by DNA must be accurately copied and transmitted from  
65 one generation to the next. In somatic cells, DNA is duplicated and equally partitioned into  
66 daughter cells via mitosis, whereas in germ cells, which give rise to gametes, chromosome  
67 segregation relies on meiosis, a specialized cell division mechanism which produces haploid  
68 cells from diploid progenitors. Meiosis requires a unique programme of finely regulated  
69 events before cell division to accomplish faithful chromosome segregation. Cognate paternal  
70 and maternal chromosomes (homologous chromosomes) find each other (homologous  
71 pairing) and then fully align; the interaction is stabilized by formation of the synaptonemal  
72 complex (SC). Ultimately, exchange of DNA (recombination) between the homologues  
73 chromosomes establishes physical connections, which are essential for faithful segregation  
74 (1, 2).

75

76 The *Caenorhabditis elegans* gonad is a powerful system for studying chromosomes during  
77 both mitosis and meiosis because of the cytological accessibility and the spatio-temporal  
78 organization of nuclei into all prophase I stages (3). Morphological changes to chromosomes  
79 mark the engagement of key steps in meiotic progression. At meiotic onset, chromatin adopts  
80 a clustered, “half-moon” shape, reflecting chromosome movement and reorganization (4-6).

81 This structure marks the transition zone (corresponding to the leptotene–zygotene stages).

82 Once homologues are aligned, a tripartite proteinaceous structure called synaptonemal  
83 complex (SC) is formed between each homologue pair to allow genetic exchange during CO-  
84 dependent DNA repair (1, 2, 7-10). DNA recombination is initiated by the deliberate  
85 induction of DNA double-strand breaks (DSBs) by the topoisomerase II-like enzyme, SPO-  
86 11 (11, 12). In all species, the number of DSBs largely exceeds the final number of COs,  
87 suggesting that many DSBs are repaired via pathways such as inter-sister repair (IS) or

88 synthesis-dependent strand annealing (13). In *C. elegans*, only one CO is formed between  
89 each homologous pair (14), and this depends on the function of the MSH-4/MSH-5  
90 heterodimer (orthologues of the yeast and mammalian MutS $\gamma$  complex components,  
91 MSH4/MSH5) (15-18), the cyclin COSA-1 (orthologue of mammalian CNTD1) (19, 20) and  
92 the E3 SUMO-ligase ZHP-3 (orthologue of yeast Zip3) (21-23). CO formation is abolished in  
93 absence of DSBs (e.g. in *spo-11* mutants) or synapsis; however, unlike in other model  
94 systems, lack of DNA breaks does not prevent SC formation in *C. elegans* (7, 11). Meiotic  
95 DSB repair also relies on RAD-51-mediated repair in *C. elegans* (24, 25): the RAD-51  
96 recombinase localizes to discrete chromatin-associated foci starting in the transition zone and  
97 peaking in early pachytene; RAD-51 disengages from DNA in mid-pachytene (7). Markers of  
98 aberrant RAD-51 loading, such as increased foci number and/or extended accumulation, are  
99 bona fide indicators of defective DSB processing and recombination. CO induction triggers  
100 reorganization of the SC components into distinct domains on bivalents (pairs of homologous  
101 chromosomes held together by a chiasma): the central elements are confined to the short arm  
102 (containing the CO) and the axial elements to the long arm (26-30). This reorganization is  
103 particularly evident during diplotene, at which stage bivalents progressively condense and  
104 appear as six DAPI-stained bodies in diakinesis nuclei, which are a read-out for the  
105 successful execution of prophase I events (aberrant structures include achiasmatic  
106 chromosomes (univalents) or fused/fragmented chromatin masses (11, 16, 31)).

107

108 The breast and ovarian cancer susceptibility protein BRCA1 and its obligate heterodimeric  
109 partner BARD1 form an E3 ubiquitin ligase module (the BCD complex), the functions of  
110 which have been extensively studied in mitotic cells (32). The BRCA1–BARD1 heterodimer  
111 promotes homologous recombination (HR) during the S–G2 stages, by both favouring  
112 extended DNA break resection and preventing the non-homologous end joining (NHEJ)-

113 promoting factor 53BP1 (33) from binding to the site of ongoing DNA repair. It also  
114 enhances BRCA2 and RAD51 loading at DNA damage sites to elicit accurate DNA repair  
115 (32). *BRCA1*-null mutants are embryonic lethal, thus hindering the study of this factor in  
116 gametogenesis (34-44). Mutants containing hypomorphic and gain-of-function alleles show  
117 increased apoptotic cell death during spermatogenesis, as well as reduced loading of the pro-  
118 CO factor MSH4 and a severe delay in MLH1 focus formation during oogenesis (45). *C.*  
119 *elegans brc-1/BRCA1* mutants are viable and fertile, albeit with increased DNA damage-  
120 dependent apoptosis during oogenesis and SPO-11-dependent accumulation of RAD-51 foci,  
121 suggesting a defect in processing meiotic recombination intermediates (46, 47). Importantly,  
122 blocking *brc-1* function in CO-defective mutants leads to the formation of aberrant chromatin  
123 bodies in diakinesis nuclei, underscoring the importance of BRC-1 in the IS repair pathway  
124 (47).

125

126 Here we report that in the *C. elegans* germline, unlike in mammalian systems, BRC-1 and  
127 BRD-1 are abundantly expressed throughout meiotic prophase I and display a dynamic  
128 localization pattern in germ cells, switching from nucleoplasmic expression in early meiotic  
129 stages to SC association in pachytene, where they become progressively enriched at  
130 chromosome subdomains bearing the CO sites. We provide in vivo evidence that BRC-1  
131 forms a complex with both MSH-5 and the SC central element, SYP-3. Localization of BRC-  
132 1 and BRD-1 in germ cells is differently regulated by synapsis and CO formation. Finally, we  
133 show that BRC-1 promotes stage-specific RAD-51 loading when SC formation is impaired  
134 and upon exogenous DNA damage induction. Similar findings are reported by Li and  
135 colleagues in the accompanying manuscript. Taken together, our data highlight the multiple  
136 functions of the BRC-1–BRD-1 heterodimer during gametogenesis.

137

## 138 **Results**

### 139 **BRC-1 and BRD-1 display a dynamic localization pattern in the germline and are** 140 **recruited to the short arm of the bivalent**

141 To gain insight into BRC-1 and BRD-1 function during gametogenesis, we analysed their  
142 localization patterns during meiotic prophase I. To this end, we tagged the endogenous *brc-1*  
143 locus with a 3' HA tag using a CRISPR/Cas9 approach (48, 49) and detected BRD-1 using a  
144 previously characterized specific antibody (46, 50). BRC-1::HA protein function was  
145 assessed by exposing the tagged animals to ionizing radiation (IR): as previously reported  
146 (46), *brc-1* mutants were sterile, whereas *brc-1::HA* worms responded to IR in a similar way  
147 to wild-type animals, thus proving that the tagged protein is fully functional (Fig 1A). Using  
148 a recently published method for isolating germline-enriched proteins (51) involving protein  
149 fractionation and western blot analysis, we showed that BRC-1::HA is enriched in the  
150 nucleus: most was in the soluble nuclear pool fraction and a smaller proportion was  
151 chromatin bound (Fig 1B). Interestingly, unlike in whole-cell extracts, BRC-1::HA was  
152 detected as a doublet in fractionated samples, suggesting that a less abundant isoform  
153 becomes detectable after enrichment with this extraction method or perhaps the presence of a  
154 post-translational modification.

155

156 Previous reports indicate that during mouse meiosis, BRCA1 localizes to nascent SC  
157 elements during the leptotene/zygotene stages; in pachytene cells, it is exclusively located at  
158 asynapsed region of the XY-sex body during spermatogenesis or on asynapsed chromosomes  
159 during oocyte meiosis (52-54). In contrast, in the *C. elegans* germline both BRC-1 and BRD-  
160 1 were expressed in all nuclei during meiotic prophase I (Figs 1C and S1A) and, as expected,  
161 largely co-localized (Fig 1D). As observed in mammalian models, BRC-1 and BRD-1  
162 loading is interdependent in nematodes: *brc-1* mutant germlines did not display any BRD-1

163 staining (Fig S1B) (55-57). Intriguingly, at the transition between mid to late pachytene,  
164 BRC-1 and BRD-1 staining switched from a rather diffuse to a discrete linear pattern along  
165 the chromosomes; in late pachytene nuclei, BRC-1 and BRD-1 progressively retracted into  
166 six short “comet-like” structures (Figs 1C, D and S1A), a specific pattern indicating  
167 localization to both CO sites and the short arm of bivalent (7, 8, 21, 22, 58, 59). To assess  
168 whether the BCD complex is indeed recruited to the short arm of the bivalent, we co-stained  
169 *brc-1::HA* germ lines with antibodies directed against the central element of the SC, SYP-1  
170 (8) and the axial protein HTP-3 (60). As shown in Fig 2A, BRC-1 co-localized with SYP-1 in  
171 late pachytene/diplotene nuclei, confirming that the BCD complex becomes gradually  
172 concentrated in the region surrounding the CO site. Strikingly, BRC-1 enrichment at discrete  
173 regions preceded SYP-1 localization to the short arm of the bivalent (six robust stretches  
174 were seen only at late pachytene/diplotene stage). At meiosis onset, the PLK-2 polo-like  
175 kinase is enriched at the nuclear envelope attachment sites of chromosome ends, where it  
176 promotes homologous pairing and synapsis (61, 62). In late pachytene, PLK-2 re-locates to  
177 discrete domains along the SC, marking local enrichment of recombination factors (63).  
178 PLK-2 redistribution also occurs before SYP-1 redistribution to the short arm and influences  
179 the SC structure (63, 64). Given that BRC-1 redistribution had similar kinetics, we co-stained  
180 PLK-2 and BRC-1 (Fig 2B) and found that regions enriched for BRC-1 fully overlapped with  
181 the PLK-2 staining pattern in late pachytene and diplotene. Thus, the BCD complex is  
182 ubiquitously expressed during meiotic prophase I and becomes progressively enriched on the  
183 short arm of the bivalent prior to SYP-1 recruitment, where it co-localizes with PLK-2.

184

### 185 **CO establishment triggers redistribution of the BRC-1–BRD-1 complex**

186 In *C. elegans*, formation of inter-homologue COs depends on several proteins, such as the  
187 COSA-1 cyclin (20), the MutS $\gamma$  heterodimer, MSH4/MSH-5 (15, 16) and the ZHP-3 E3



188 SUMO-ligase (22). MSH-5 and ZHP-3 are detected at early meiotic stages, with the former  
189 accumulating in many foci (these are probably recombination intermediates with both CO  
190 and non-CO (NCO) outcomes) and the latter localizing along the SC (20-22). COSA-1 is  
191 prominently detected at mid-late pachytene transition as six foci (one CO for each  
192 homologue pair), which also contain MSH-5 and ZHP-3 (20). Since we observed BRC-1 and  
193 BRD-1 recruitment to the short arm of bivalents (chromosome subdomains caused by the  
194 formation of CO intermediates (26, 27, 29)), we wondered whether local enrichment of the  
195 BCD complex coincides with the regions labelled with pro-CO factors. Comparison of the  
196 localization dynamics of GFP::COSA-1 and BRC-1::HA showed that BRC-1 starts to  
197 become concentrated concomitantly with enhanced COSA-1 loading and defines a discrete  
198 area which later also contains SYP-1 (Fig 3A). We obtained the same localization pattern by  
199 monitoring BRD-1 loading (Fig S2). Furthermore, staining with anti-ZHP-3 antibody (21)  
200 also revealed full co-localization of ZHP-3 with BRC-1 (Fig 3A). To evaluate BRC-1 co-  
201 localization with MSH-5, we first added a 5' GFP tag to the endogenous *msh-5* locus with  
202 CRISPR/Cas9. The tagged line was fully functional, with no defects in chiasmata formation  
203 (not shown), suggesting that GFP::MSH-5 is competent to promote CO formation. Similar to  
204 ZHP-3 and COSA-1, BRC-1::HA was enriched at defined regions containing a single  
205 GFP::MSH-5 focus, which also labels the CO site (Fig 3B). We performed structured  
206 illumination microscopy to further analyse BRC-1 association with the CO site. For this, we  
207 added a 5' OLLAS tag to the endogenous *cosa-1* locus (65, 66). This fully functional line was  
208 crossed into *brc-1::HA* worms and co-stained for OLLAS (COSA-1), BRC-1 and SYP-1.  
209 This further confirmed BRC-1 enrichment around COSA-1-labelled CO sites; however, in  
210 these nuclei BRC-1 decorates the region of the SC embracing the putative recombination site;  
211 thus, it appears to surround, rather than overlapping with, COSA-1 (Fig 3C).  
212

213 To assess whether BRC-1–BRD-1 redistribution depends on CO establishment, we generated  
214 a *brc-1::HA; spo-11* mutant strain to monitor BRC-1::HA loading in absence of meiotic  
215 DSBs, which are essential for inducing CO formation. A previous report showed that in *spo-*  
216 *11* mutants COSA-1 occasionally forms very few foci (possibly arising from mitotic or  
217 spontaneous DSBs) and ZHP-3 remains localized along the SC without forming retraction  
218 “comets” due to a lack of chiasmata (20). In *spo-11* mutants, BRC-1 remained co-localized  
219 with ZHP-3 along the SC, without redistributing to chromosome subdomains. This confirms  
220 that BRC-1 redistribution depends on chiasmata formation (Fig 3D).

221  
222 Exogenous DSB induction is sufficient to temporarily restore COSA-1 loading and therefore  
223 chiasmata formation in *spo-11* mutants (11, 20, 64). Thus, we investigated whether  $\gamma$ -  
224 irradiation could rescue the failure in BRC-1 redistribution. We exposed *brc-1::HA; spo-11*  
225 mutant worms to 20 Gy and analysed BRC-1 and ZHP-3 loading at 8 hours post irradiation:  
226 at this time point, all late pachytene nuclei in *spo-11* mutants display six COSA-1 foci,  
227 suggesting that CO induction is fully rescued (20). In the irradiated samples, ZHP-3 was  
228 retracted towards the CO site and, consistent with this, BRC-1 also became concentrated  
229 around the CO site (Fig 3E). Based on these data, we conclude that BRC-1 and BRD-1  
230 localize to the short arms of bivalents and that their reorganization in mid-pachytene nuclei is  
231 dependent on CO establishment.

### 232 **BRC-1 physically interacts with MSH-5 and SYP-3 in vivo**

233 Given its spatial association with both CO factors and the SC, we wondered whether BRC-1  
234 formed protein complexes with these factors in vivo. We performed pull-down experiments  
235 using the *brc-1::HA; GFP::msh-5* strain (Fig 3) and crossed *brc-1::HA* into worms expressing  
236 a single-copy insertion transgene encoding a largely functional GFP::SYP-3 protein (67).  
237 Worms from both strains were used to generate cytosolic, soluble nuclear and chromatin-

238 bound protein fractions (51): both nuclear fractions were pooled for immunoprecipitation  
239 experiments. Immunoprecipitation of GFP::MSH-5 and GFP::SYP-3 from *brc-1::HA*;  
240 *GFP::msh-5* and *syp-3*; [*GFP::syp-3*]; *brc-1::HA* strains, respectively, followed by western  
241 blot analysis with anti-HA antibodies revealed that that BRC-1::HA was present in both  
242 samples (Fig 3F). This suggests that BRC-1 forms a complex with both MSH-5 and SYP-3  
243 proteins in vivo. Thus, we identified a previously unknown physical interaction of the BCD  
244 complex with the pro-CO factor MSH-5 and the SC central element SYP-3, highlighting a  
245 possible role for BRC-1–BRD-1 at the interface between synapsis and recombination.

246

#### 247 **Synapsis and recombination have different effects on BRC-1 and BRD-1 loading**

248 Given that CO establishment triggers BRC-1–BRD-1 redistribution (Fig 3C, D), we sought to  
249 analyse their localization in mutants that have impairment at different steps of CO formation.  
250 As already mentioned, an absence of DSBs leads to a lack of recombination, which prevents  
251 BRC-1 and BRD-1 retraction to the short arms of bivalents. We therefore asked whether  
252 impaired DNA repair by HR, but not by DSB induction, influences BRC-1 and BRD-1  
253 localization. To address this, we crossed *brc-1::HA* into the *msh-5* mutant, which cannot  
254 convert recombination intermediates into mature CO products (7, 16). In *msh-5* mutants,  
255 BRC-1 accumulated along the SC but retraction was not observed (Fig 4A), similar to the  
256 localization pattern observed in *spo-11* (Fig 3). Then, we analysed BRC-1::HA staining in  
257 *rad-51* mutants, which have normal SC assembly but no homologous DNA repair due to lack  
258 of RAD-51-dependent strand displacement and invasion of the homologous chromosome (24,  
259 25). Interestingly, BRC-1 had a rather punctate staining pattern, perhaps through labelling  
260 recombination-independent DNA joined molecules (Fig 4A). Despite this, a strong  
261 association with SYP-1 in chromosome subdomains was observed in nuclei exiting the  
262 pachytene stage (we also observed this in *msh-5* mutants). We observed a similar pattern of

263 BRD-1 localization in *com-1* mutants (Fig S3): here, interfering with DSB resection impairs  
264 RAD-51 loading and therefore abolishes CO formation (68). These results suggest that a lack  
265 of COs per se impairs redistribution of the BCD complex in late pachytene cells without  
266 perturbing loading along the SC. However, in mutants such as *rad-51* that are defective in the  
267 early steps of recombination, BRC-1–BRD-1 association with the SC is also dramatically  
268 reduced. Next, we sought to analyse whether BRC-1 and BRD-1 loading is regulated by  
269 synapsis. We analysed BRC-1::HA loading in the complete and partial absence of SC, as well  
270 as in mutants in which synapsis occurs between non-homologous chromosomes. The central  
271 portion of the SC is formed by several proteins (SYP-1–4) which are loaded in an  
272 interdependent manner; thus, all are necessary to establish synapsis (7, 8, 58, 59). In the *syp-2*  
273 synapsis-null mutant (7), BRC-1::HA had a rather punctate staining pattern throughout  
274 meiotic prophase I. Strikingly, unlike in the wild type, where BRC-1 starts to spread along  
275 the SC immediately after the disappearance of RAD-51, in *syp-2* mutants BRC-1 foci  
276 remained in close proximity to and co-localized with RAD-51 foci in mid and late pachytene  
277 nuclei (Fig 4B). In *C. elegans*, a family of zinc-finger nuclear proteins connects  
278 chromosome-specific ends (i.e. pairing centres) to the nuclear envelope to promote  
279 chromosome pairing and synapsis (69, 70). ZIM-2 and HIM-8 bind to the ends of  
280 chromosomes V and X, respectively. Therefore, chromosome V is asynapsed in *zim-2*  
281 mutants and chromosome X is asynapsed in *him-8* mutants. We asked whether a partial  
282 deficiency in synapsis establishment (affecting only one chromosome pair) also changes  
283 BRC-1 loading dynamics. Analysis of BRC-1::HA expression in *him-8* and *zim-2* mutants  
284 revealed a lack of BRC-1 on unsynapsed chromosomes pairs, despite normal loading along  
285 the SC and retraction towards the CO site in the remaining bivalents (Fig 4C,D), suggesting  
286 that local synapsis defects do not impair BRC-1 loading. Lastly, we analysed BRD-1 loading  
287 in two mutants with deregulated SC assembly. HTP-1 is a HORMA-domain-containing

288 protein essential to prevent SC assembly between non-homologous chromosomes and  
289 PROM-1 is an F-box protein involved in promoting meiotic entry and homologous pairing.  
290 Both *htp-1* and *prom-1* mutants display extensive SYP-1 loading between non-homologous  
291 chromosomes as well as asynapsed chromosome regions; consequentially, chiasmata  
292 formation is severely impaired (26, 71). Remarkably, the degree of BRD-1 co-localization  
293 with SYP-1 was extremely reduced in both *htp-1* and *prom-1* mutants, with most BRD-1  
294 detected as bright agglomerates within the nucleus (Fig S4). Thus, we conclude that BRC-1  
295 and BRD-1 redistribution during meiotic progression requires CO establishment and is tightly  
296 regulated by SCs.

297

### 298 **BRC-1 promotes RAD-51 recruitment in the absence of synapsis**

299 BRC-1 is dispensable for establishing synapsis and chiasmata; however, *brc-1* mutant  
300 germlines have a higher number of and more persistent RAD-51-labelled recombination  
301 intermediates compared with the wild type (Fig S5) (46, 47). Impaired BRC-1 localization,  
302 and probably also impaired function, in CO-defective mutants leads to the formation of  
303 abnormal chromosome structures in diakinesis nuclei, possibly due to deficient IS repair (47).  
304 DSB repair during meiosis is channelled into both CO and NCO pathways. Since it has been  
305 suggested that BRC-1 might preferentially function in NCOs (47), we investigated whether  
306 other factors involved in resolving the recombination intermediates required for both CO and  
307 NCO repair might also be affected. In somatic cells, the RTR complex mediates efficient  
308 resolution of recombination intermediates by promoting the dissolution of double Holliday  
309 junctions to yield non-CO products (72-74). RMI1 is an essential component of the RTR  
310 complex and a scaffolding component for other complex members, BLM and TOP3A, which  
311 promotes their dissolution activity (74). The *C. elegans* RMI1 orthologue, RMH-1, localizes  
312 to recombination foci during meiosis: it appears in early pachytene and peaks in mid-

313 pachytene, accumulating in many foci and possibly labelling all recombination intermediates.  
314 At late pachytene transition, the number of RMH-1 foci is reduced to roughly six per nucleus;  
315 these foci co-localize with foci of the pro-CO factors COSA-1, MSH-5 and ZHP-3. Lack of  
316 RMH-1 causes a drastic reduction in chiasmata formation due to impaired COSA-1 and  
317 MSH-5 loading. However, in CO-deficient backgrounds such as *cosa-1*, *msh-5* and *zhp-3*  
318 mutants, RMH-1 is still recruited in early pachytene but is not retained until late pachytene.  
319 Therefore, it has been postulated that RMH-1 functions in both the CO and NCO pathways  
320 (75). MSH-5 displays a similar localization, but does not fully co-localize with RMH-1 (20,  
321 75). We scored COSA-1, MSH-5 and RMH-1 nuclear localization in *brc-1* mutants in nuclei  
322 spanning the transition zone to late pachytene stage. Interestingly, GFP::*MSH-5*  
323 accumulation was reduced in early and mid-pachytene, with a similar, but less prominent,  
324 trend for GFP::*RMH-1* (Fig 5A,B). By late pachytene, both proteins had been recruited into  
325 six foci, together with COSA-1, suggesting that the early processing of recombination  
326 intermediates might be defective in absence of *BRC-1*.  
327  
328 Given that *BRC-1* and *BRD-1* loading are regulated by synapsis and the establishment of  
329 COs, and that a lack of *BRC-1* might affect the processing of NCOs rather than COs, we next  
330 assessed the effects of *BRC-1* depletion in genetic backgrounds defective in chiasmata  
331 formation, which hence rely solely on NCOs to repair meiotic DSBs. We first analysed  
332 DAPI-stained bodies in diakinesis nuclei from *cosa-1 brc-1* and *brc-1; syp-2* double mutants  
333 to confirm the presence of aberrant chromatin structures (Fig 6A), as previously reported (46,  
334 47). As abnormalities in diakinesis nuclei can result from impaired RAD-51-dependent repair  
335 of meiotic DSBs (24, 31, 76), we sought to analyse whether lack of *brc-1* altered RAD-51  
336 dynamics. To this end, we quantified RAD-51 in *cosa-1 brc-1* and *brc-1; syp-2* mutants.  
337 Failure to convert recombination intermediates into mature CO products has been linked to

338 increased RAD-51 levels and its delayed removal during meiotic prophase due to either  
339 excessive DSB induction or slower processing of recombination intermediates (5, 6, 15, 16),  
340 which are eventually channelled into alternative repair pathways (e.g. IS repair) (7). In fact,  
341 both *cosa-1* and *syp-2* mutants accumulated high levels of RAD-51, which disengaged from  
342 chromatin in mid and late pachytene, respectively (Fig 6B, C) (7, 20). Remarkably, removal  
343 of BRC-1 from *cosa-1* and *syp-2* mutants had different effects on RAD-51 dynamics: in both  
344 *cosa-1 brc-1* and *brc-1; syp-2* double mutants, there were far fewer RAD-51 foci in early  
345 pachytene compared with both single mutants; however, in *cosa-1 brc-1* mutants RAD-51  
346 accumulation was dramatically prolonged until diplotene, whereas in the *brc-1; syp-2* mutant  
347 overall RAD-51 staining was dramatically reduced (Fig 6B, C). Aberrant chromosome  
348 structures occurred at a particularly high frequency in *brc-1; syp-2* mutants, consistent with  
349 the severe reduction in RAD-51 loading in pachytene nuclei (Fig 6A). Thus, in CO-defective  
350 mutants, BRC-1 regulation of RAD-51 dynamics is altered by the presence of the SC.

351

### 352 **Efficient RAD-51-mediated repair upon exogenous DSB induction requires functional** 353 **BRC-1**

354 Exposure of *brc-1* and *brd-1* mutants to IR causes dose-dependent hypersensitivity which  
355 eventually culminates in full sterility, possibly due to the formation of highly unstructured  
356 chromatin bodies in diakinesis nuclei (46). These structures resemble those formed upon  
357 BRC-2/BRCA2 depletion, which in worms is essential for RAD-51 loading (31, 76), and  
358 COM-1/Sae2 depletion, which promotes DSB resection (68, 77). Both mutants lack RAD-51  
359 recruitment onto DNA during meiotic prophase I. We therefore sought to investigate whether  
360 the aberrant chromatin masses observed in irradiated *brc-1* mutants were caused by impaired  
361 RAD-51 recruitment. To be efficiently loaded to the single-stranded DNA (ssDNA) tails  
362 generated after resection, RAD-51 must be exchanged with RPA (RPA-1 in worms), which

363 coats ssDNA tails to stabilize them and prevent DNA from self-winding (78, 79). We  
364 generated a *brc-1* mutant strain expressing RPA-1::YFP (80) and analysed RAD-51 and  
365 RPA-1 loading at two different time points post irradiation. We observed a dramatic  
366 reduction in RAD-51 focus formation specifically in mid to late pachytene nuclei of *brc-1*  
367 mutants, along with enhanced RPA-1 levels (Fig 7A). At 24 hours post irradiation, both  
368 RAD-51 and RPA-1 were still abundant in [*rpa-1::YFP*] animals; in contrast, in *brc-1*; [*rpa-*  
369 *1::YFP*] mutants RPA-1 was still expressed at higher levels than in controls, but RAD-51 was  
370 remarkably reduced (Fig 7B). Prompted by these results, we decided to analyse the loading  
371 dynamics of BRC-1::HA and RAD-51 after IR exposure to assess whether exogenous DSB  
372 formation affects the mutual spatio-temporal regulation of these proteins. Under  
373 physiological growth conditions, BRC-1 and RAD-51 localization did not overlap prior to  
374 BRC-1 enrichment in the SC, which occurs after RAD-51 disappearance (Fig S6A, B). At  
375 1 hour post irradiation, BRC-1::HA started to form discrete chromatin-associated foci in pre-  
376 meiotic nuclei, often in close proximity to (but not co-localizing with) RAD-51 foci  
377 (Fig S6A,B). Although abundant RAD-51 accumulation was triggered by IR exposure  
378 throughout the germline, BRC-1::HA levels were only modestly increased. However, western  
379 blot analysis revealed a shift in BRC-1::HA migration after IR which remained unchanged  
380 throughout the time course (Fig S6C), suggesting that exogenous DNA damage might elicit  
381 post-translational modifications of BRC-1. Western blot analysis also showed a slight  
382 increase in BRC-1::HA abundance, confirming our immunofluorescence data (Fig S6A). In  
383 meiotic nuclei, BRC-1 was detected along the SC at an earlier time point than in non-  
384 irradiated animals, but retraction towards the short arms of bivalents appeared delayed  
385 (Fig S6A). Samples analysed 8 hours after IR revealed robust BRC-1 and RAD-51 co-  
386 localization in nuclei residing in the mitotic tip; however, as at the earlier time point, no clear  
387 co-localization was observed in pachytene nuclei (Fig S6A, B). At 24 hours post irradiation,



388 BRC-1::HA foci in the mitotic nuclei had largely disappeared and bright RAD-51 foci were  
389 observed only in enlarged, G2-arrested nuclei that were still undergoing repair; in contrast,  
390 bright RAD-51 foci co-localizing with BRC-1 were occasionally seen in non-arrested nuclei.  
391 Nuclei progressing through meiotic prophase I displayed more BRC-1 accumulation along  
392 chromosomes at 24 hours post irradiation compared with unirradiated controls. Taken  
393 together, our observations revealed that BRC-1 accumulation in the germline is modulated by  
394 exogenous DNA damage and that the clear BRC-1 and RAD-51 co-localization observed  
395 only in mitotic nuclei was cell cycle dependent.

396

## 397 **Discussion**

398 Our study sheds new light on the expression dynamics of the *C. elegans* BRC-1–BRD-1  
399 heterodimer during meiotic prophase I and reveals that BRC-1 regulates RAD-51  
400 accumulation in the germline under both unchallenged conditions and upon exogenous DNA  
401 damage induction. We show that in contrast to mammalian meiosis, where BRCA1 is loaded  
402 exclusively at asynapsed chromosome regions during spermatogenesis and oogenesis in  
403 pachytene cells (52-54), in worms both BRC-1 and BRD-1 are expressed throughout meiotic  
404 prophase I and are progressively enriched on the short arms of bivalents, in a CO- and SC-  
405 dependent manner. Our data provide the first evidence that BRC-1 forms a complex in vivo  
406 with the pro-CO factor MSH-5 and the SC central element SYP-3. Taken together, our  
407 findings provide new insight into the meiotic functions of BRC-1 and BRD-1 and show that  
408 the BCD complex is essential for preserving genome integrity and stimulating HR during  
409 gametogenesis.

410

411 **The BCD complex functions at the interface of synapsis and recombination**

412 BRC-1 and BRD-1 display a highly dynamic localization pattern during meiotic prophase I  
413 progression, shifting from a pattern of rather diffuse accumulation at early stages to a robust  
414 association with the SC, which culminates in retention of the BCD complex at the region of  
415 the bivalent harbouring the chiasma (Figs 1–3). Remarkably, accumulation of BRC-1–BRD-1  
416 at specific chromosomal subdomains occurred prior to retraction of the SC central elements  
417 to those domains but was concomitant with recombination factor-dependent enrichment of  
418 PLK-2 at the SC (Fig 2B) (63, 64), suggesting that the BCD complex is actively targeted to  
419 the region surrounding the CO rather than passively recruited following SC remodelling.  
420 The fact that recruitment of BRC-1–BRD-1 to the region surrounding the chiasma has similar  
421 kinetics to PLK-2 recruitment and precedes SYP-1 redistribution suggests that the BCD  
422 complex (i) is brought into place via physical interaction with the CO machinery (Fig 3); (ii)  
423 might respond to changes in the physical properties of the SC, as triggered by chiasmata  
424 formation or (iii) might be directly induced by PLK-2.  
425 Importantly, Li et al. (accompanying manuscript) observe the same localization pattern for  
426 BRC-1 and BRD-1 by employing GFP-tagged functional lines. However, in contrast with the  
427 aforementioned study in which they analysed localization in live worms, we did not detect  
428 BRD-1 loading in fixed *brc-1* mutant germlines, confirming what was previously reported in  
429 (50). This difference might be possibly due to distinctive processing of the samples or tag-  
430 dependent alterations of the properties of the fusion proteins (81).

431

432 Our data favour a model in which the SC is essential for initial recruitment of the BCD  
433 complex onto the chromosomes and later accumulates at the CO site due to the local  
434 concentration of recombination factors. In fact, BRC-1 recruitment to the SC is not prevented  
435 in *msh-5* or *spo-11* mutants (both of which are defective in CO formation but proficient in

436 synapsis establishment). However, similar to ZHP-3, BRC-1 fails to retract (Figs 3C and 4A).  
437 Irradiation of *spo-11* mutants restored BRC-1 and ZHP-3 redistribution to the short arms of  
438 bivalents (Fig 3D), confirming that CO establishment per se is the key trigger of local BCD  
439 complex enrichment. Abrogation of synapsis dramatically changed the BRC-1 expression  
440 pattern: it remained punctate throughout meiotic prophase I and displayed extensive and  
441 specifically co-localization with RAD-51 in late pachytene cells (Fig 4B). However, in  
442 mutants in which only one chromosome pair was asynapsed, such as *him-8* and *zim-2*  
443 mutants, BRC-1 was not loaded onto the unsynapsed regions but loading dynamics were  
444 normal for the other chromosome regions (Fig 4C, D). It was recently shown that PLK-2  
445 plays a pivotal role in modulating the physical state of the SC in response to recombination  
446 and that an absence of synapsis impairs PLK-2 redistribution from the nuclear envelope to  
447 chromosome subdomains (63, 64, 82), which might explain the different BRC-1 localization  
448 patterns in *syp-2* mutants. Different BRD-1 localization patterns were observed in *htp-1* and  
449 *prom-1* mutants, but both were characterized by extensive non-homologous synapsis. BRD-1  
450 accumulated in bright agglomerates in the nucleus, suggesting that SYP loading per se is not  
451 sufficient to recruit BRC-1–BRD-1 onto the SC (Fig S6).

452

### 453 **Crosstalk between the BCD complex and RAD-51 is governed by the SC**

454 Blocking BRC-1 function had opposing effects on the progression of recombination  
455 intermediates in *cosa-1* and *syp-2* (CO-defective) mutants. RAD-51 accumulation was  
456 exacerbated in *cosa-1* single mutants and largely suppressed in *syp-2* mutants (Fig 6), leading  
457 to the formation of aberrant chromatin masses in diakinesis nuclei both mutant backgrounds,  
458 as previously reported (47). Based on genetic data, BRC-1 function was previously  
459 postulated to be essential for IS repair of meiotic DSBs (47, 83, 84); our data corroborate this  
460 model. In *cosa-1 brc-1* double mutants, the presence of an intact SC might still impose a

461 homologue-biased constraint for an inter-homologue, CO-independent pathway that relies on  
462 RAD-51-mediated repair but not on BRC-1 function. However, in the absence of synapsis,  
463 repair of recombination intermediates is probably channelled entirely through the IS repair  
464 pathway because the sister chromatid is the only available repair template: SC depletion  
465 triggers association of BRC-1 with RAD-51 in late pachytene cells at presumptive repair  
466 sites, thereby promoting HR-mediated repair. We also observed fewer RAD-51 foci in *brc-1*;  
467 *syp-2* double mutants during early pachytene, suggesting that BRC-1 is nonetheless required  
468 to (directly or indirectly) promote efficient RAD-51 loading, although co-localization with  
469 RAD-51 at meiotic onset might be very transient. We observed that a lack of BRC-1 reduces  
470 the loading of recombination markers such as MSH-5 and RMH-1 in early pachytene,  
471 suggesting that even in the presence of the SC, BRC-1–BRD-1 function is required to  
472 efficiently promote the processing of recombination intermediates. Moreover, in *brc-1*  
473 mutants exposed to exogenous DSB induction, RAD-51 is not efficiently retained in mid- to  
474 late pachytene cells (Fig 7). This is not due to impaired resection, as shown by the abundant  
475 recruitment of RPA-1, which stabilizes ssDNA. However, RAD-51 loading is comparable to  
476 controls in later stages, suggesting that stabilization, rather than loading per se, might require  
477 the action of the BCD complex. This is in line with the findings reported by Li et al. (see  
478 accompanying manuscript).

479 When we scored BRC-1 levels after exposure to IR, we detected a slight increase in  
480 abundance but a marked difference in protein migration on western blots (Fig S6), suggesting  
481 that exogenous DNA damage promotes post-translational modification of BRC-1.  
482 Importantly, despite dramatically enhanced RAD-51 levels upon irradiation, we observed  
483 clear co-localization with BRC-1 only in mitotic cells and not during pachytene, once again  
484 confirming that these proteins co-localize only when the SC is indeed absent (Fig S6).

485

486 Our findings suggest that the BCD complex responds to both synapsis and recombination and  
487 that the SC might act as a docking site for the BRC-1–BRD-1 complex to modulate its  
488 function in promoting DNA repair.

489

## 490 **Materials and methods**

### 491 **Worm strains**

492 All the worm strains used were grown at 20°C and the N2 Bristol strain was used as the wild  
493 type. The following alleles were used: LGI: *syp-3(ok758)*, *prom-1(ok1140)*; LGII:  
494 [*GFP::rmh-1*] (75), [*GFP::syp-3*] (67), [*GFP::cosa-1*] (20) ; LGIII: *brc-1(tm1145)*, *brc-*  
495 *1::HA* (this study), *brd-1(gk297)*, *cosa-1(tm3298)*, *OLLAS::cosa-1* (this study), *com-1(t1626)*;  
496 LGIV: *spo-11(ok79)*, *him-8(tm611)*, *zim-2(tm574)*, *msh-5(me23)*, *GFP::msh-5* (this study),  
497 *htp-1(gk174)*, *rad-51(lg8701)*; LGV: *syp-2(ok307)*. No information is available on the  
498 chromosomal integration of [*rpa-1::YFP*] (80).

499

### 500 **Cytological procedures**

501 For cytological analysis of whole-mount gonads, age-matched worms (24 hours post-L4  
502 stage) were dissected in 1× PBS on a Superfrost Plus charged slide and fixed with an equal  
503 volume of 2% PFA in 1× PBS for 5 min at room temperature. Slides were freeze-cracked in  
504 liquid nitrogen and then incubated in methanol -20°C for 5 min, followed by three washes in  
505 PBST (1× PBS, 0.1% Tween) at room temperature. Slides were blocked for 1 hour at room  
506 temperature in PBST containing 1% BSA and then primary antibodies were added in PBST  
507 and incubated overnight at 4°C. Slides were then washed in PBST at room temperature and  
508 secondary antibodies were applied for 2 hours. After three washes in PBST for 10 min each,

509 60  $\mu$ l of a 2  $\mu$ g/ml stock solution of DAPI in water was added to each slide and stained for  
510 1 min at room temperature. Samples were washed again for at least 20 min in PBST and then  
511 mounted with Vectashield. For detection of GFP::MSH-5, worms were dissected and fixed in  
512 1 $\times$  EGG buffer containing 0.1% Tween (instead of PBST). Detection of [RPA-1::YFP] was  
513 performed as previously described (85). Primary antibodies used in this study were: mouse  
514 monoclonal anti-HA tag (pre-absorbed on N2 worms to reduce non-specific binding; 1:1000  
515 dilution; Covance), rabbit anti-HA tag (1:250 dilution; Invitrogen), rabbit anti-BRD-1 (1:500  
516 dilution) (50), chicken anti-SYP-1 (1:400 dilution) (51), guinea pig anti-HTP-3 (1:500  
517 dilution) (60), mouse monoclonal anti-GFP (1:500 dilution; Roche), guinea pig anti-ZHP-3  
518 (1:500 dilution) (21), rabbit anti-OLLAS tag (pre-absorbed on N2 worms to reduce non-  
519 specific binding; 1:1500 dilution; GenScript), rabbit anti-RAD-51 (1:10,000 dilution; SDIX)  
520 and rabbit anti-PLK-2 (1:500 dilution) (86). Appropriate secondary antibodies were  
521 conjugated with Alexa Fluor 488 or 594 (1:500 dilution) or with Alexa Fluor 647 (1:250  
522 dilution). Images were collected as z-stacks (0.3  $\mu$ m intervals) using an UPlanSApo 100x NA  
523 1.40 objective on a DeltaVision System equipped with a CoolSNAP HQ2 camera. Files were  
524 deconvolved with SoftWORx software and processed in Adobe Photoshop, where some false  
525 colouring was applied. Samples acquired by super-resolution microscopy (Fig 3C) were  
526 prepared as previously reported (63) without modifications and imaged with a DeltaVision  
527 OMX.

528

## 529 **Biochemistry**

530 For whole-cell protein extraction, 200 age-matched animals (24 hours post-L4 stage) were  
531 picked into 1 $\times$  Tris-EDTA buffer (10 mM Tris pH 8, 1 mM EDTA) containing 1 $\times$  protein  
532 inhibitor cocktail (Roche), snap-frozen in liquid nitrogen. After thawing, an equal volume of

533 2× Laemmli buffer was added. Samples were boiled for 10 min, clarified and separated on  
534 pre-cast 4–20% gradient acrylamide gels (Bio Rad).  
535  
536 Fractionated protein extracts for western blotting and immunoprecipitation were prepared as  
537 previously reported (51). Western blotting used 50 µg protein samples from each fraction,  
538 whereas immunoprecipitation assays used at least 1 mg samples of pooled soluble nuclear  
539 and chromatin-bound fractions. Proteins were transferred onto nitrocellulose membrane for  
540 1 hour at 4°C at 100V in 1× Tris-glycine buffer containing 20% methanol. Membranes were  
541 blocked for 1 hour in 1× TBS containing 0.1% Tween (TBST) and 5% milk; primary  
542 antibodies were added into the same buffer and incubated overnight at 4°C. Membranes were  
543 then washed in 1× TBST and then incubated with appropriate secondary antibodies in TBST  
544 containing 5% milk for 2 hours at room temperature. After washing, membranes were  
545 incubated with ECL and developed with a ChemiDoc system (BioRad). To detect  
546 phosphorylated CHK-1<sup>S345</sup>, TBST containing 5% BSA (instead of milk) was used for  
547 blocking and antibody dilution. The following antibodies were used for western blotting:  
548 mouse monoclonal anti-HA tag (1:1000 dilution; Cell Signalling), rabbit anti-HA tag (1:500  
549 dilution; Invitrogen), chicken anti-GFP (1:4000 dilution; Abcam), mouse anti-GAPDH  
550 (1:5000 dilution; Ambion), rabbit anti-Histone H3 (1:100,000 dilution; Abcam); rabbit anti-  
551 phospho-CHK-1<sup>S345</sup> (1:1000 dilution; Cell Signalling), HRP-conjugated anti-mouse (1:2500  
552 dilution) and anti-rabbit (1:25,000 dilution; both Jackson ImmunoResearch) and HRP-  
553 conjugated anti-chicken (1:10,000 dilution; Santa Cruz).

554

### 555 **Irradiation**

556 Age-matched worms (24 hours post-L4 stage) were exposed to the indicated dose of IR with  
557 a Gammacell irradiator containing a <sup>137</sup>Cs source. For viability screening, irradiated worms

558 were allowed to lay eggs for 24 hours and then removed; hatched versus unhatched eggs were  
559 scored the following day. For cytological analysis, worms were dissected and immunostained  
560 at the indicated times.

561

## 562 **CRISPR-Cas9 Tagging**

563 All the details relative to the tagging strategy followed to generate the *brc-1::HA*,  
564 *OLLAS::cosa-1* and *GFP::msh-5* lines are available upon request.

565

## 566 **Acknowledgements**

567 We are grateful to S. Boulton, N. Bhalla, E. Martinez-Perez, M. Zetka and R. Lin for kindly  
568 providing the anti-BRD-1, anti-ZHP-3, anti-SYP-1, anti-HTP-3 and anti-PLK-2 antibodies  
569 respectively. We thank A. Graf for performing the microinjections, and J. Yanowitz and J.  
570 Engebrecht for sharing unpublished data. Some strains were provided by the CGC, which is  
571 funded by the NIH Office of Research Infrastructure Programs (P40 OD010440). NS is the  
572 recipient of an Interdisciplinary Cancer Research fellowship (INDICAR) funded by the  
573 Mahlke-Obermann Stiftung and the European Union's Seventh Framework Programme for  
574 Research, Technological Development under grant agreement no 609431. Research in VJ  
575 laboratory is funded by the Austrian Science Fund (project no. SFB F3415-B19). MRDS was  
576 supported by the Austrian Science Fund doctoral programme (project no. W1238).

577

## 578 **Author contributions**

579 Conceptualization: NS.; Funding acquisition: NS.; Investigation: NS, EJ, MRDS.;  
580 Methodology: NS.; Project administration: NS.; Resources: NS VJ.; Visualization: NS.  
581 Writing (original draft): NS.



## 582 **References**

- 583 1. Zickler D. [The synaptonemal complex: a structure necessary for pairing,  
584 recombination or organization of the meiotic chromosome?]. *J Soc Biol.*  
585 1999;193(1):17-22.
- 586 2. Zickler D, Kleckner N. Recombination, Pairing, and Synapsis of Homologs during  
587 Meiosis. *Cold Spring Harb Perspect Biol.* 2015;7(6).
- 588 3. Hillers KJ, Jantsch V, Martinez-Perez E, Yanowitz JL. Meiosis. *WormBook.* 2015:1-  
589 54.
- 590 4. Baudrimont A, Penkner A, Woglar A, Machacek T, Wegrosteck C, Gloggnitzer J, et  
591 al. Leptotene/zygotene chromosome movement via the SUN/KASH protein bridge in  
592 *Caenorhabditis elegans*. *PLoS Genet.* 2010;6(11):e1001219.
- 593 5. Rosu S, Zawadzki KA, Stamper EL, Libuda DE, Reese AL, Dernburg AF, et al. The  
594 *C. elegans* DSB-2 protein reveals a regulatory network that controls competence for  
595 meiotic DSB formation and promotes crossover assurance. *PLoS Genet.*  
596 2013;9(8):e1003674.
- 597 6. Stamper EL, Rodenbusch SE, Rosu S, Ahringer J, Villeneuve AM, Dernburg AF.  
598 Identification of DSB-1, a protein required for initiation of meiotic recombination in  
599 *Caenorhabditis elegans*, illuminates a crossover assurance checkpoint. *PLoS Genet.*  
600 2013;9(8):e1003679.
- 601 7. Colaiacovo MP, MacQueen AJ, Martinez-Perez E, McDonald K, Adamo A, La Volpe  
602 A, et al. Synaptonemal complex assembly in *C. elegans* is dispensable for loading strand-  
603 exchange proteins but critical for proper completion of recombination. *Dev Cell.*  
604 2003;5(3):463-74.
- 605 8. MacQueen AJ, Colaiacovo MP, McDonald K, Villeneuve AM. Synapsis-dependent  
606 and -independent mechanisms stabilize homolog pairing during meiotic prophase in *C.*  
607 *elegans*. *Genes Dev.* 2002;16(18):2428-42.
- 608 9. Cohen PE, Pollard JW. Regulation of meiotic recombination and prophase I  
609 progression in mammals. *Bioessays.* 2001;23(11):996-1009.
- 610 10. Zickler D, Kleckner N. Meiotic chromosomes: integrating structure and function.  
611 *Annu Rev Genet.* 1999;33:603-754.
- 612 11. Dernburg AF, McDonald K, Moulder G, Barstead R, Dresser M, Villeneuve AM.  
613 Meiotic recombination in *C. elegans* initiates by a conserved mechanism and is  
614 dispensable for homologous chromosome synapsis. *Cell.* 1998;94(3):387-98.
- 615 12. Keeney S, Neale MJ. Initiation of meiotic recombination by formation of DNA  
616 double-strand breaks: mechanism and regulation. *Biochem Soc Trans.* 2006;34(Pt  
617 4):523-5.
- 618 13. Mets DG, Meyer BJ. Condensins regulate meiotic DNA break distribution, thus  
619 crossover frequency, by controlling chromosome structure. *Cell.* 2009;139(1):73-86.
- 620 14. Hillers KJ, Villeneuve AM. Chromosome-wide control of meiotic crossing over in  
621 *C. elegans*. *Curr Biol.* 2003;13(18):1641-7.
- 622 15. Zalevsky J, MacQueen AJ, Duffy JB, Kempfues KJ, Villeneuve AM. Crossing over  
623 during *Caenorhabditis elegans* meiosis requires a conserved MutS-based pathway that  
624 is partially dispensable in budding yeast. *Genetics.* 1999;153(3):1271-83.
- 625 16. Kelly KO, Dernburg AF, Stanfield GM, Villeneuve AM. *Caenorhabditis elegans*  
626 *msh-5* is required for both normal and radiation-induced meiotic crossing over but not  
627 for completion of meiosis. *Genetics.* 2000;156(2):617-30.

- 628 17. Edelmann W, Cohen PE, Kneitz B, Winand N, Lia M, Heyer J, et al. Mammalian  
629 MutS homologue 5 is required for chromosome pairing in meiosis. *Nat Genet.*  
630 1999;21(1):123-7.
- 631 18. Pochart P, Woltering D, Hollingsworth NM. Conserved properties between  
632 functionally distinct MutS homologs in yeast. *J Biol Chem.* 1997;272(48):30345-9.
- 633 19. Holloway JK, Sun X, Yokoo R, Villeneuve AM, Cohen PE. Mammalian CNTD1 is  
634 critical for meiotic crossover maturation and deselection of excess precrossover sites. *J*  
635 *Cell Biol.* 2014;205(5):633-41.
- 636 20. Yokoo R, Zawadzki KA, Nabeshima K, Drake M, Arur S, Villeneuve AM. COSA-1  
637 reveals robust homeostasis and separable licensing and reinforcement steps governing  
638 meiotic crossovers. *Cell.* 2012;149(1):75-87.
- 639 21. Bhalla N, Wynne DJ, Jantsch V, Dernburg AF. ZHP-3 acts at crossovers to couple  
640 meiotic recombination with synaptonemal complex disassembly and bivalent formation  
641 in *C. elegans*. *PLoS Genet.* 2008;4(10):e1000235.
- 642 22. Jantsch V, Pasierbek P, Mueller MM, Schweizer D, Jantsch M, Loidl J. Targeted  
643 gene knockout reveals a role in meiotic recombination for ZHP-3, a Zip3-related protein  
644 in *Caenorhabditis elegans*. *Mol Cell Biol.* 2004;24(18):7998-8006.
- 645 23. Agarwal S, Roeder GS. Zip3 provides a link between recombination enzymes and  
646 synaptonemal complex proteins. *Cell.* 2000;102(2):245-55.
- 647 24. Rinaldo C, Bazzicalupo P, Ederle S, Hilliard M, La Volpe A. Roles for  
648 *Caenorhabditis elegans* rad-51 in meiosis and in resistance to ionizing radiation during  
649 development. *Genetics.* 2002;160(2):471-9.
- 650 25. Alpi A, Pasierbek P, Gartner A, Loidl J. Genetic and cytological characterization of  
651 the recombination protein RAD-51 in *Caenorhabditis elegans*. *Chromosoma.*  
652 2003;112(1):6-16.
- 653 26. Martinez-Perez E, Villeneuve AM. HTP-1-dependent constraints coordinate  
654 homolog pairing and synapsis and promote chiasma formation during *C. elegans*  
655 meiosis. *Genes Dev.* 2005;19(22):2727-43.
- 656 27. Martinez-Perez E, Schvarzstein M, Barroso C, Lightfoot J, Dernburg AF,  
657 Villeneuve AM. Crossovers trigger a remodeling of meiotic chromosome axis  
658 composition that is linked to two-step loss of sister chromatid cohesion. *Genes Dev.*  
659 2008;22(20):2886-901.
- 660 28. de Carvalho CE, Zaaijer S, Smolikov S, Gu Y, Schumacher JM, Colaiacovo MP. LAB-  
661 1 antagonizes the Aurora B kinase in *C. elegans*. *Genes Dev.* 2008;22(20):2869-85.
- 662 29. Clemons AM, Brockway HM, Yin Y, Kasinathan B, Butterfield YS, Jones SJ, et al.  
663 akirin is required for diakinesis bivalent structure and synaptonemal complex  
664 disassembly at meiotic prophase I. *Mol Biol Cell.* 2013;24(7):1053-67.
- 665 30. Zetka MC, Kawasaki I, Strome S, Muller F. Synapsis and chiasma formation in  
666 *Caenorhabditis elegans* require HIM-3, a meiotic chromosome core component that  
667 functions in chromosome segregation. *Genes Dev.* 1999;13(17):2258-70.
- 668 31. Martin JS, Winkelmann N, Petalcorin MI, McIlwraith MJ, Boulton SJ. RAD-51-  
669 dependent and -independent roles of a *Caenorhabditis elegans* BRCA2-related protein  
670 during DNA double-strand break repair. *Mol Cell Biol.* 2005;25(8):3127-39.
- 671 32. Prakash R, Zhang Y, Feng W, Jasin M. Homologous recombination and human  
672 health: the roles of BRCA1, BRCA2, and associated proteins. *Cold Spring Harb Perspect*  
673 *Biol.* 2015;7(4):a016600.
- 674 33. Schwertman P, Bekker-Jensen S, Mailand N. Regulation of DNA double-strand  
675 break repair by ubiquitin and ubiquitin-like modifiers. *Nat Rev Mol Cell Biol.*  
676 2016;17(6):379-94.

- 677 34. Bachelier R, Xu X, Wang X, Li W, Naramura M, Gu H, et al. Normal lymphocyte  
678 development and thymic lymphoma formation in Brca1 exon-11-deficient mice.  
679 *Oncogene*. 2003;22(4):528-37.
- 680 35. Cao L, Li W, Kim S, Brodie SG, Deng CX. Senescence, aging, and malignant  
681 transformation mediated by p53 in mice lacking the Brca1 full-length isoform. *Genes*  
682 *Dev*. 2003;17(2):201-13.
- 683 36. Chandler J, Hohenstein P, Swing DA, Tessarollo L, Sharan SK. Human BRCA1 gene  
684 rescues the embryonic lethality of Brca1 mutant mice. *Genesis*. 2001;29(2):72-7.
- 685 37. Cui J, Shen F, Jiang F, Wang Y, Bian J, Shen Z. [Loss of heterozygosity and  
686 microsatellite instability in the region including BRCA1 of breast cancer in Chinese].  
687 *Zhonghua Yi Xue Yi Chuan Xue Za Zhi*. 1998;15(6):348-50.
- 688 38. Gowen LC, Johnson BL, Latour AM, Sulik KK, Koller BH. Brca1 deficiency results  
689 in early embryonic lethality characterized by neuroepithelial abnormalities. *Nat Genet*.  
690 1996;12(2):191-4.
- 691 39. Hakem R, de la Pompa JL, Sirard C, Mo R, Woo M, Hakem A, et al. The tumor  
692 suppressor gene Brca1 is required for embryonic cellular proliferation in the mouse.  
693 *Cell*. 1996;85(7):1009-23.
- 694 40. Hohenstein P, Kielman MF, Breukel C, Bennett LM, Wiseman R, Krimpenfort P, et  
695 al. A targeted mouse Brca1 mutation removing the last BRCT repeat results in apoptosis  
696 and embryonic lethality at the headfold stage. *Oncogene*. 2001;20(20):2544-50.
- 697 41. Liu CY, Flesken-Nikitin A, Li S, Zeng Y, Lee WH. Inactivation of the mouse Brca1  
698 gene leads to failure in the morphogenesis of the egg cylinder in early postimplantation  
699 development. *Genes Dev*. 1996;10(14):1835-43.
- 700 42. Ludwig T, Chapman DL, Papaioannou VE, Efstratiadis A. Targeted mutations of  
701 breast cancer susceptibility gene homologs in mice: lethal phenotypes of Brca1, Brca2,  
702 Brca1/Brca2, Brca1/p53, and Brca2/p53 nullizygous embryos. *Genes Dev*.  
703 1997;11(10):1226-41.
- 704 43. Ludwig T, Fisher P, Ganesan S, Efstratiadis A. Tumorigenesis in mice carrying a  
705 truncating Brca1 mutation. *Genes Dev*. 2001;15(10):1188-93.
- 706 44. Shen SX, Weaver Z, Xu X, Li C, Weinstein M, Chen L, et al. A targeted disruption of  
707 the murine Brca1 gene causes gamma-irradiation hypersensitivity and genetic  
708 instability. *Oncogene*. 1998;17(24):3115-24.
- 709 45. Broering TJ, Alavattam KG, Sadreyev RI, Ichijima Y, Kato Y, Hasegawa K, et al.  
710 BRCA1 establishes DNA damage signaling and pericentric heterochromatin of the X  
711 chromosome in male meiosis. *J Cell Biol*. 2014;205(5):663-75.
- 712 46. Boulton SJ, Martin JS, Polanowska J, Hill DE, Gartner A, Vidal M. BRCA1/BARD1  
713 orthologs required for DNA repair in *Caenorhabditis elegans*. *Curr Biol*. 2004;14(1):33-  
714 9.
- 715 47. Adamo A, Montemauri P, Silva N, Ward JD, Boulton SJ, La Volpe A. BRC-1 acts in  
716 the inter-sister pathway of meiotic double-strand break repair. *EMBO Rep*.  
717 2008;9(3):287-92.
- 718 48. Paix A, Folkmann A, Rasoloson D, Seydoux G. High Efficiency, Homology-Directed  
719 Genome Editing in *Caenorhabditis elegans* Using CRISPR-Cas9 Ribonucleoprotein  
720 Complexes. *Genetics*. 2015;201(1):47-54.
- 721 49. Friedland AE, Tzur YB, Esvelt KM, Colaiacovo MP, Church GM, Calarco JA.  
722 Heritable genome editing in *C. elegans* via a CRISPR-Cas9 system. *Nat Methods*.  
723 2013;10(8):741-3.

- 724 50. Polanowska J, Martin JS, Garcia-Muse T, Petalcorin MI, Boulton SJ. A conserved  
725 pathway to activate BRCA1-dependent ubiquitylation at DNA damage sites. *EMBO J.*  
726 2006;25(10):2178-88.
- 727 51. Silva N, Ferrandiz N, Barroso C, Tognetti S, Lightfoot J, Telecan O, et al. The  
728 fidelity of synaptonemal complex assembly is regulated by a signaling mechanism that  
729 controls early meiotic progression. *Dev Cell.* 2014;31(4):503-11.
- 730 52. Turner JM, Mahadevaiah SK, Fernandez-Capetillo O, Nussenzweig A, Xu X, Deng  
731 CX, et al. Silencing of unsynapsed meiotic chromosomes in the mouse. *Nat Genet.*  
732 2005;37(1):41-7.
- 733 53. Turner JM, Aprelikova O, Xu X, Wang R, Kim S, Chandramouli GV, et al. BRCA1,  
734 histone H2AX phosphorylation, and male meiotic sex chromosome inactivation. *Curr*  
735 *Biol.* 2004;14(23):2135-42.
- 736 54. Scully R, Chen J, Plug A, Xiao Y, Weaver D, Feunteun J, et al. Association of BRCA1  
737 with Rad51 in mitotic and meiotic cells. *Cell.* 1997;88(2):265-75.
- 738 55. Au WW, Henderson BR. The BRCA1 RING and BRCT domains cooperate in  
739 targeting BRCA1 to ionizing radiation-induced nuclear foci. *J Biol Chem.*  
740 2005;280(8):6993-7001.
- 741 56. Fabbro M, Rodriguez JA, Baer R, Henderson BR. BARD1 induces BRCA1  
742 intranuclear foci formation by increasing RING-dependent BRCA1 nuclear import and  
743 inhibiting BRCA1 nuclear export. *J Biol Chem.* 2002;277(24):21315-24.
- 744 57. Li M, Yu X. Function of BRCA1 in the DNA damage response is mediated by ADP-  
745 ribosylation. *Cancer Cell.* 2013;23(5):693-704.
- 746 58. Smolikov S, Eizinger A, Schild-Prufert K, Hurlburt A, McDonald K, Engebrecht J, et  
747 al. SYP-3 restricts synaptonemal complex assembly to bridge paired chromosome axes  
748 during meiosis in *Caenorhabditis elegans*. *Genetics.* 2007;176(4):2015-25.
- 749 59. Smolikov S, Schild-Prufert K, Colaiacovo MP. A yeast two-hybrid screen for SYP-3  
750 interactors identifies SYP-4, a component required for synaptonemal complex assembly  
751 and chiasma formation in *Caenorhabditis elegans* meiosis. *PLoS Genet.*  
752 2009;5(10):e1000669.
- 753 60. Goodyer W, Kaitna S, Couteau F, Ward JD, Boulton SJ, Zetka M. HTP-3 links DSB  
754 formation with homolog pairing and crossing over during *C. elegans* meiosis. *Dev Cell.*  
755 2008;14(2):263-74.
- 756 61. Labella S, Woglar A, Jantsch V, Zetka M. Polo kinases establish links between  
757 meiotic chromosomes and cytoskeletal forces essential for homolog pairing. *Dev Cell.*  
758 2011;21(5):948-58.
- 759 62. Harper NC, Rillo R, Jover-Gil S, Assaf ZJ, Bhalla N, Dernburg AF. Pairing centers  
760 recruit a Polo-like kinase to orchestrate meiotic chromosome dynamics in *C. elegans*.  
761 *Dev Cell.* 2011;21(5):934-47.
- 762 63. Pattabiraman D, Roelens B, Woglar A, Villeneuve AM. Meiotic recombination  
763 modulates the structure and dynamics of the synaptonemal complex during *C. elegans*  
764 meiosis. *PLoS Genet.* 2017;13(3):e1006670.
- 765 64. Machovina TS, Mainpal R, Daryabeigi A, McGovern O, Paouneskou D, Labella S, et  
766 al. A Surveillance System Ensures Crossover Formation in *C. elegans*. *Curr Biol.*  
767 2016;26(21):2873-84.
- 768 65. Park SH, Cheong C, Idoyaga J, Kim JY, Choi JH, Do Y, et al. Generation and  
769 application of new rat monoclonal antibodies against synthetic FLAG and OLLAS tags for  
770 improved immunodetection. *J Immunol Methods.* 2008;331(1-2):27-38.

- 771 66. Idoyaga J, Cheong C, Suda K, Suda N, Kim JY, Lee H, et al. Cutting edge:  
772 langerin/CD207 receptor on dendritic cells mediates efficient antigen presentation on  
773 MHC I and II products in vivo. *J Immunol.* 2008;180(6):3647-50.
- 774 67. Rog O, Dernburg AF. Direct Visualization Reveals Kinetics of Meiotic  
775 Chromosome Synapsis. *Cell Rep.* 2015.
- 776 68. Penkner A, Portik-Dobos Z, Tang L, Schnabel R, Novatchkova M, Jantsch V, et al. A  
777 conserved function for a *Caenorhabditis elegans* Com1/Sae2/CtIP protein homolog in  
778 meiotic recombination. *EMBO J.* 2007;26(24):5071-82.
- 779 69. Phillips CM, Dernburg AF. A family of zinc-finger proteins is required for  
780 chromosome-specific pairing and synapsis during meiosis in *C. elegans*. *Dev Cell.*  
781 2006;11(6):817-29.
- 782 70. Phillips CM, Wong C, Bhalla N, Carlton PM, Weiser P, Meneely PM, et al. HIM-8  
783 binds to the X chromosome pairing center and mediates chromosome-specific meiotic  
784 synapsis. *Cell.* 2005;123(6):1051-63.
- 785 71. Jantsch V, Tang L, Pasierbek P, Penkner A, Nayak S, Baudrimont A, et al.  
786 *Caenorhabditis elegans* prom-1 is required for meiotic prophase progression and  
787 homologous chromosome pairing. *Mol Biol Cell.* 2007;18(12):4911-20.
- 788 72. Yin J, Sobek A, Xu C, Meetei AR, Hoatlin M, Li L, et al. BLAP75, an essential  
789 component of Bloom's syndrome protein complexes that maintain genome integrity.  
790 *EMBO J.* 2005;24(7):1465-76.
- 791 73. Raynard S, Bussen W, Sung P. A double Holliday junction dissolvosome  
792 comprising BLM, topoisomerase IIIalpha, and BLAP75. *J Biol Chem.*  
793 2006;281(20):13861-4.
- 794 74. Wu L, Bachrati CZ, Ou J, Xu C, Yin J, Chang M, et al. BLAP75/RMI1 promotes the  
795 BLM-dependent dissolution of homologous recombination intermediates. *Proc Natl*  
796 *Acad Sci U S A.* 2006;103(11):4068-73.
- 797 75. Jagut M, Hamminger P, Woglar A, Millonigg S, Paulin L, Mikl M, et al. Separable  
798 Roles for a *Caenorhabditis elegans* RMI1 Homolog in Promoting and Antagonizing  
799 Meiotic Crossovers Ensure Faithful Chromosome Inheritance. *PLoS Biol.*  
800 2016;14(3):e1002412.
- 801 76. Petalcorin MI, Galkin VE, Yu X, Egelman EH, Boulton SJ. Stabilization of RAD-51-  
802 DNA filaments via an interaction domain in *Caenorhabditis elegans* BRCA2. *Proc Natl*  
803 *Acad Sci U S A.* 2007;104(20):8299-304.
- 804 77. Lemmens BB, Johnson NM, Tijsterman M. COM-1 promotes homologous  
805 recombination during *Caenorhabditis elegans* meiosis by antagonizing Ku-mediated  
806 non-homologous end joining. *PLoS Genet.* 2013;9(2):e1003276.
- 807 78. Chen R, Wold MS. Replication protein A: single-stranded DNA's first responder:  
808 dynamic DNA-interactions allow replication protein A to direct single-strand DNA  
809 intermediates into different pathways for synthesis or repair. *Bioessays.*  
810 2014;36(12):1156-61.
- 811 79. Wold MS. Replication protein A: a heterotrimeric, single-stranded DNA-binding  
812 protein required for eukaryotic DNA metabolism. *Annu Rev Biochem.* 1997;66:61-92.
- 813 80. Stergiou L, Eberhard R, Doukoumetzidis K, Hengartner MO. NER and HR  
814 pathways act sequentially to promote UV-C-induced germ cell apoptosis in  
815 *Caenorhabditis elegans*. *Cell Death Differ.* 2011;18(5):897-906.
- 816 81. Miyawaki A, Tsien RY. Monitoring protein conformations and interactions by  
817 fluorescence resonance energy transfer between mutants of green fluorescent protein.  
818 *Methods Enzymol.* 2000;327:472-500.

- 819 82. Nadarajan S, Lambert TJ, Altendorfer E, Gao J, Blower MD, Waters JC, et al. Polo-  
820 like kinase-dependent phosphorylation of the synaptonemal complex protein SYP-4  
821 regulates double-strand break formation through a negative feedback loop. *Elife*.  
822 2017;6.
- 823 83. Wolters S, Ermolaeva MA, Bickel JS, Fingerhut JM, Khanikar J, Chan RC, et al. Loss  
824 of *Caenorhabditis elegans* BRCA1 promotes genome stability during replication in smc-  
825 5 mutants. *Genetics*. 2014;196(4):985-99.
- 826 84. Hong Y, Sonnevile R, Agostinho A, Meier B, Wang B, Blow JJ, et al. The SMC-5/6  
827 Complex and the HIM-6 (BLM) Helicase Synergistically Promote Meiotic Recombination  
828 Intermediate Processing and Chromosome Maturation during *Caenorhabditis elegans*  
829 Meiosis. *PLoS Genet*. 2016;12(3):e1005872.
- 830 85. Checchi PM, Lawrence KS, Van MV, Larson BJ, Engebrecht J. Pseudosynapsis and  
831 decreased stringency of meiotic repair pathway choice on the hemizygous sex  
832 chromosome of *Caenorhabditis elegans* males. *Genetics*. 2014;197(2):543-60.
- 833 86. Nishi Y, Rogers E, Robertson SM, Lin R. Polo kinases regulate *C. elegans*  
834 embryonic polarity via binding to DYRK2-primed MEX-5 and MEX-6. *Development*.  
835 2008;135(4):687-97.
- 836

837

838 **Figure captions**

839

840 **Fig 1. BRC-1–BRD-1 expression and localization during gametogenesis.** (A) BRC-1::HA

841 function was assessed by exposing worms to IR and then scoring the hatch rate of embryos

842 laid in the following 24 hours. The mean of two independent experiments is shown. (B) Left:

843 western blot analysis using an anti-HA antibody to monitor BRC-1::HA expression in whole-

844 cell extracts. Actin was the loading control. Right: protein fractionation showing BRC-1::HA

845 enrichment in the nucleus. Equal amounts of protein were loaded for each fraction. C =

846 cytosol, NS = soluble nuclear pool, CB= chromatin-bound pool. GAPDH and histone H3

847 were used as loading controls for the cytosolic and chromatin-bound samples, respectively.

848 (C) Top: whole-mount gonad from *brc-1::HA* worms dissected and stained with DAPI and

849 anti-HA antibody, showing ubiquitous BRC-1::HA expression throughout the germline. Note

850 the progressive enrichment on the SC and short arms of bivalents. Bottom: enlarged images

851 of specific regions of the gonad: mitotic tip (red frame), mid-pachytene (yellow frame) and

852 late pachytene/diplotene (magenta frame). Scale bar, 10  $\mu$ m. (D) Late pachytene nuclei

853 stained with DAPI and anti-HA and BRD-1 antibodies display full co-localization of BRC-

854 1::HA and BRD-1. Scale bar, 10  $\mu$ m.

855

856 **Fig 2. BRC-1 is enriched on the short arms of bivalents and co-localizes with SYP-1 and**

857 **PLK-2.** (A) BRC-1::HA, HTP-3 and SYP-1 localization patterns at different stages of

858 meiotic prophase I. TZ = transition zone, MP = mid-pachytene, LP = late pachytene, DP =

859 diplotene. Scale bar, 5  $\mu$ m. (B) BRC-1::HA co-staining with anti-PLK-2 and anti-SYP-1

860 shows that BRC-1 is recruited concomitantly with PLK-2 and before SYP-1 to the shorts arm

861 of bivalents. Scale bar, 30  $\mu$ m (left) and 5  $\mu$ m (right).

862

863 **Fig 3. BRC-1 forms a complex with the CO machinery and the SC in vivo.** (A) BRC-  
864 1::HA co-localizes with pro-CO factor COSA-1 in late prophase I. MP/LP = mid-/late  
865 pachytene, LP/DP = late pachytene/diplotene. Scale bar, 5  $\mu$ m. (B) BRC-1::HA co-localizes  
866 with ZHP-3 and GFP::MSH-5 in late pachytene nuclei. Scale bar, 5  $\mu$ m. (C) Partial  
867 projections of nuclei under super-resolution structured illumination microscopy: different  
868 examples show BRC-1::HA localization in the region surrounding the COSA-1-labelled CO  
869 site. BRC-1::HA forms a nodule-like structure together with SYP-1. (D) Late pachytene  
870 nuclei in non-irradiated samples show altered BRC-1::HA localization in *spo-11* mutants:  
871 BRC-1 and ZHP-3 remain localized along the SC without retraction to the short arms of  
872 bivalents. (E) Ionizing radiation rescues ZHP-3 and BRC-1::HA redistribution in *spo-11*  
873 mutants. (F) BRC-1::HA co-immunoprecipitates with GFP::MSH-5 and GFP::SYP-3 in vivo.  
874 GFP pull-downs were also performed in wild-type worms (WT) as a negative control.

875

876 **Fig 4. Recombination and synapsis differentially regulate BRC-1 localization.** (A) BRC-  
877 1::HA localization was assessed in *msh-5* and *rad-51* mutants. In the *msh-5* mutant, BRC-  
878 1::HA accumulates in the SC, as in *spo-11* mutants; in the *rad-51* mutant, it displays  
879 interspersed staining, and association with the SC is strongly reduced. Scale bar, 10  $\mu$ m. (B)  
880 Abrogation of synapsis triggers BRC-1::HA accumulation into discrete chromatin-associated  
881 foci which co-localize with RAD-51 in late pachytene cells. Scale bar, 5  $\mu$ m. (C) Unlike in  
882 the *him-8* or *zim-2* mutant, respectively, BRC-1::HA does not accumulate on asynapsed  
883 chromosome X or V in late pachytene nuclei. Arrows indicate regions of DNA devoid of  
884 both SYP-1 and BRC-1::HA. Scale bar, 5  $\mu$ m. (D) Diplotene nuclei of *him-8* and *zim-2*  
885 mutants clearly lack BRC-1::HA on asynapsed univalents (circled). Scale bar, 5  $\mu$ m.

886



887 **Fig 5. Analysis of recombination markers in *brc-1* mutants.** (A) Quantification of  
888 GFP::*RMH-1*, GFP::*MSH-5* and OLLAS::*COSA-1* markers in *brc-1* mutants and control  
889 animals. Gonads were divided into four equal regions from the transition zone to the late  
890 pachytene stage. The average number of foci per nucleus from at least three gonads per  
891 genotype is shown. For GFP::*RMH-1* and OLLAS::*COSA-1* quantification, the number of  
892 nuclei scored for each gonad region in the controls (and *brc-1* mutants) were: zone 1, 242  
893 (334); zone 2, 185 (244); zone 3, (181 (214); zone 4, 124 (136). For GFP::*MSH-5*  
894 quantification, the equivalent numbers were: zone 1, 230 (403); zone 2, 210 (410); zone 3,  
895 165 (303); zone 4, 121 (147). Error bars show S.E.M. (B) Representative nuclei at different  
896 meiotic stages co-stained for GFP::*RMH-1* with OLLAS::*COSA-1* (upper panels) or  
897 GFP::*MSH-5* (lower panels). Scale bar, 5  $\mu$ m. Note that both GFP::*RMH-1* and GFP::*MSH-5*  
898 are expressed in fewer foci in early and mid-pachytene but not in late pachytene in *brc-1*  
899 mutants.

900

901 **Fig 6. Loss of BRC-1 differently influences RAD-51 loading in *cosa-1* and *syp-2***

902 **mutants.** (A) Left: quantification of DAPI-stained bodies in diakinesis nuclei in different  
903 genotypes. Number of diakinesis nuclei scored: *cosa-1*, 42; *cosa-1 brc-1*, 48; *syp-2*, 31; *brc-*  
904 *1*; *syp-2*, 79. Right: representative images of DAPI-stained diakinesis nuclei. Scale bar, 3  $\mu$ m.  
905 (B) Quantification of RAD-51 foci per nucleus throughout the germline. Each gonad was  
906 divided into seven equal zones and RAD-51 foci were counted in each nucleus. Data show  
907 the average of at least three gonads for each genotype. Number of nuclei scored from zone 1  
908 to zone 7 in different mutants: *cosa-1* – 162, 225, 179, 165, 142, 107, 124; *cosa-1 brc-1* –  
909 347, 335, 285, 274, 228, 175, 149; *syp-2* – 244, 265, 241, 233, 190, 131, 118; *brc-1*; *syp-2* –  
910 226, 305, 275, 297, 254, 161, 147. Error bars show S.E.M. (C) Whole-mount gonad stained  
911 with DAPI and anti-RAD-51 antibody. Note accumulation of RAD-51 foci in late pachytene

912 in *cosa-1 brc-1* double mutants, which is not observed in *cosa-1* single mutants. In *brc-1*;  
913 *syp-2* animals, the number of RAD-51 foci was dramatically reduced. Scale bars, 30  $\mu$ m.

914

915 **Fig 7. Efficient accumulation/exchange of RAD-51 and RPA-1 upon exogenous DNA**

916 **damage requires BRC-1 function.** (A) Time course analysis of RAD-51 and RPA-1::YFP

917 DNA loading in irradiated *brc-1* and controls. Worms were irradiated with 75 Gy IR and

918 analysed after 8 hours. Nuclei in mid-pachytene display enhanced RPA-1 levels and

919 drastically reduced RAD-51 levels in *brc-1* mutants compared with controls. (B) The same

920 analysis performed at 24 hours post irradiation showed severely reduced RAD-51, with

921 higher RPA-1 levels that were identical to those at the earlier time point. Scale bars, 30  $\mu$ m.

922 **Supplementary figure captions**

923

924 **S1 Fig. BRD-1 and BRC-1 localization patterns are identical during meiotic prophase I.**

925 (A) BRD-1 and SYP-1 immunostaining in wild-type animals shows that the BRD-1

926 expression pattern is identical to the one observed for BRC-1::HA. Note enrichment on the

927 SC and retraction to the short arms of bivalents. Scale bar, 30  $\mu$ m. (B) Interdependent DNA

928 loading for BRD-1 and BRC-1 is shown by a lack of DNA-binding by BRD-1 in *brc-1*

929 mutant germlines. Scale bar, 5  $\mu$ m.

930

931 **S2 Fig. BRD-1 is enriched at chromosome subdomains containing presumptive CO**

932 **sites.** Late pachytene nuclei of [*GFP::cosa-1*] animals were stained for BRD-1, GFP and

933 SYP-1. As previously observed for BRC-1, BRD-1 is progressively enriched at regions

934 surrounding the CO site. Scale bar, 5  $\mu$ m.

935

936 **S3 Fig. Association of BRD-1 with the SC is largely disrupted in DSBs resection-**  
937 **defective *com-1* mutants.** Mid-/late pachytene nuclei of the wild type (WT) and *com-1*  
938 mutant were stained for BRD-1. BRD-1 loading onto the SC is drastically reduced when  
939 DNA resection is impaired. Scale bar, 5  $\mu$ m.

940

941 **S4 Fig. Non-homologous synapsis largely impairs loading of BRD-1, leading to**  
942 **nucleoplasmic accumulation.** Late pachytene nuclei in the wild-type (WT) and *htp-1* and  
943 *prom-1* mutants were stained with BRD-1, SYP-1 and HTP-3. In both mutants, BRD-1 is  
944 largely excluded from the SC and forms nucleoplasmic agglomerates. Scale bar, 5  $\mu$ m.

945

946 **S5 Fig. Synapsis and chiasmata formation occur normally but RAD-51 foci accumulate**  
947 **in the *brc-1* mutant.** (A) SC assembly in the wild type (WT) and *brc-1* mutant was  
948 monitored by co-staining for the axial element HTP-3 and central element SYP-1. The *brc-1*  
949 mutant had no obvious defect in establishing synapsis. Scale bar, 5  $\mu$ m. (B) DAPI-staining of  
950 diakinesis nuclei does not show defective chiasmata formation in the *brc-1* mutant. Scale bar,  
951 5  $\mu$ m. Number of diakinesis nuclei analysed: WT, 44; *brc-1* mutant, 46. Error bars show  
952 standard deviation. (C) Top: quantification revealed an accumulation and delayed  
953 disappearance of RAD-51 foci in the absence of BRC-1. Bottom: representative nuclei from  
954 early pachytene (EP) and late pachytene (LP) stages stained with DAPI and anti-RAD-51  
955 antibody. Scale bar, 5  $\mu$ m. For RAD-51 foci quantification, the following numbers of nuclei  
956 were counted in each region in WT (and the *brc-1* mutant): zone 1, 154 (173); zone 2, 226  
957 (189); zone 3, 189 (186); zone 4, 157 (156); zone 5, 113 (136); zone 6, 95 (125); zone 7, 92  
958 (72). Error bars show S.E.M.

959

960 **S6 Fig. Exogenous DNA damage increases BRC-1 levels and triggers its association with**  
961 **RAD-51 in mitotic nuclei.** (A) Whole-mount gonads of irradiated and non-irradiated *brc-*  
962 *1::HA* worms immunostained for HA and RAD-51. Animals were exposed 75 Gy IR and  
963 analysed at the indicated time points. (B) Representative nuclei from the pre-meiotic region  
964 (MT) and late pachytene (LP) stage of gonads analysed at different times after IR. Note  
965 BRC-1::HA focus formation in pre-meiotic nuclei, along with robust co-localization with  
966 RAD-51 at 8 hours and occasionally at 24 hours post irradiation. Scale bars, 5  $\mu$ m. (C)  
967 Western blot analysis of whole-cell extracts show a shift in BRC-1::HA migration after  
968 irradiation. Wild-type (wt) worms were the negative control. Actin was the loading control  
969 and induction of phosphorylated CHK-1<sup>Ser345</sup> was used as a positive control for irradiation.  
970 The ratio of BRC-1::HA to actin (HA/Actin) is shown as an abundance index.  
971

**A**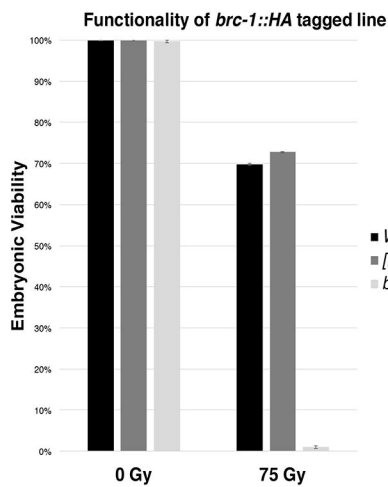**B**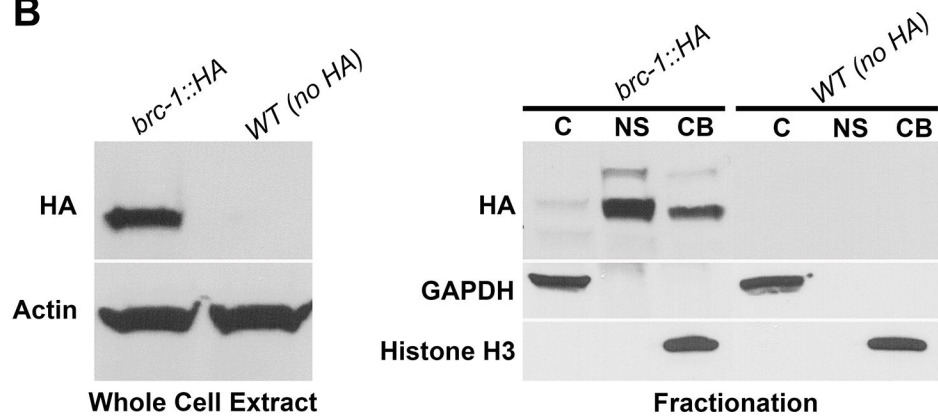**C**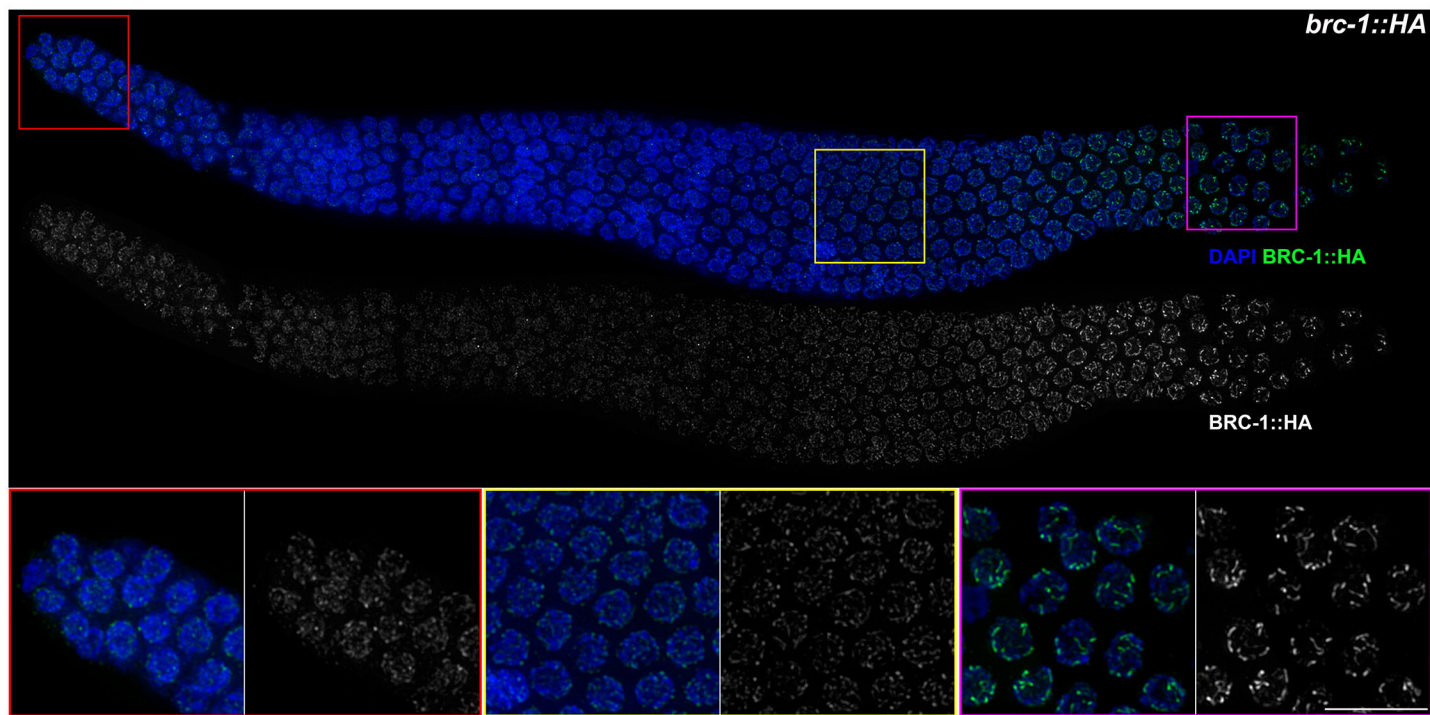**D**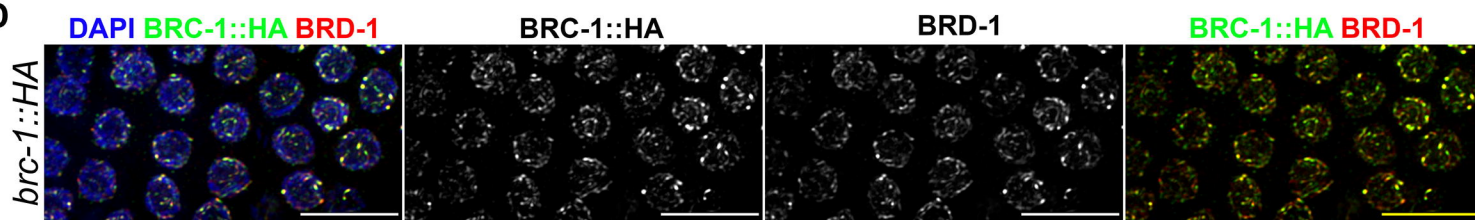

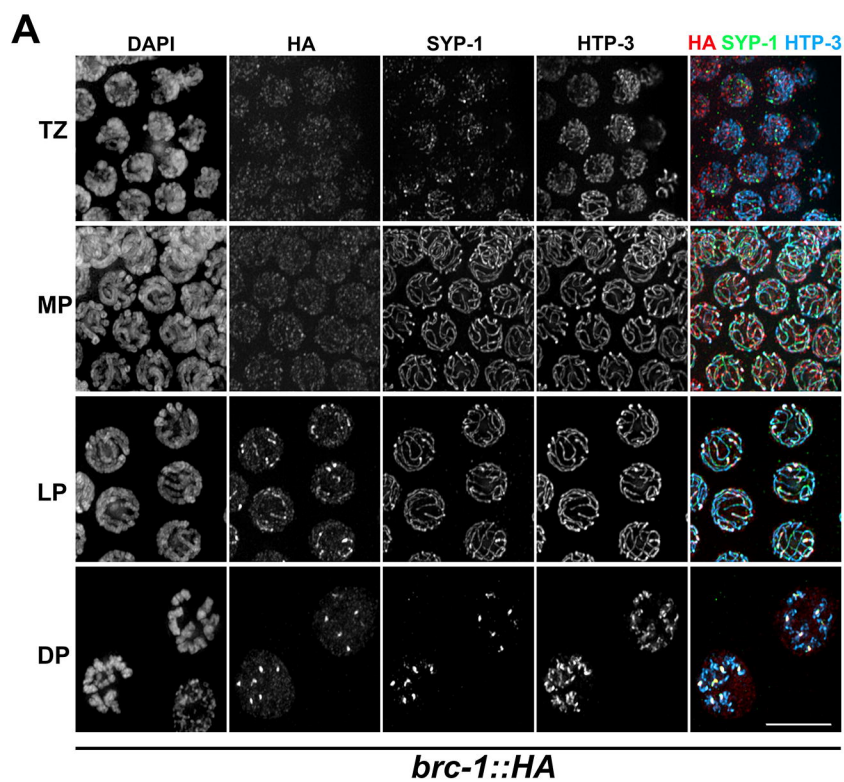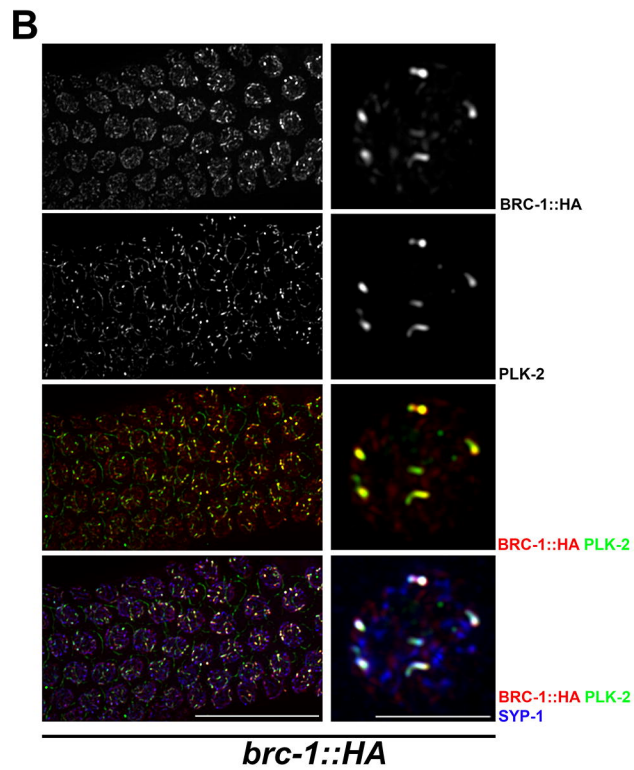

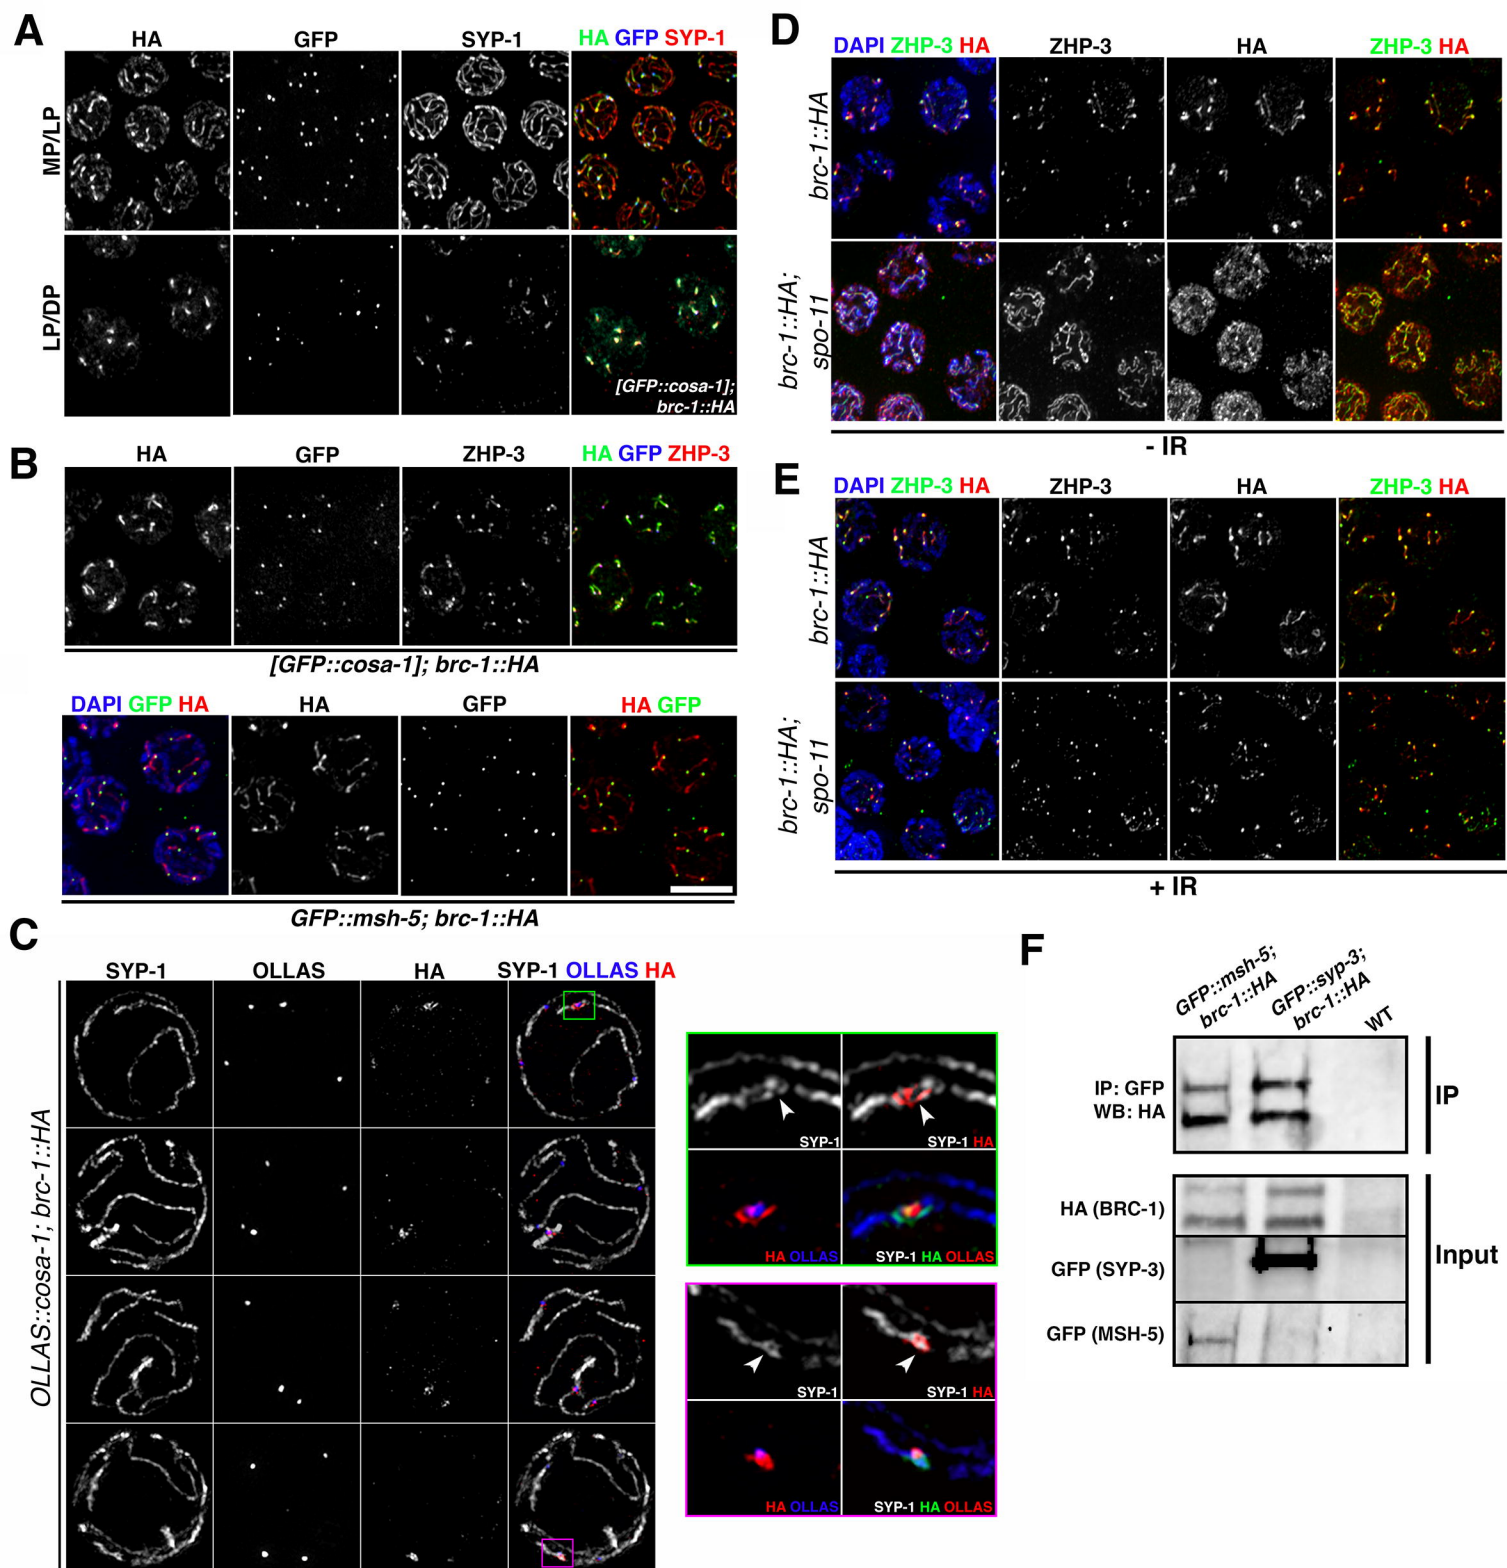

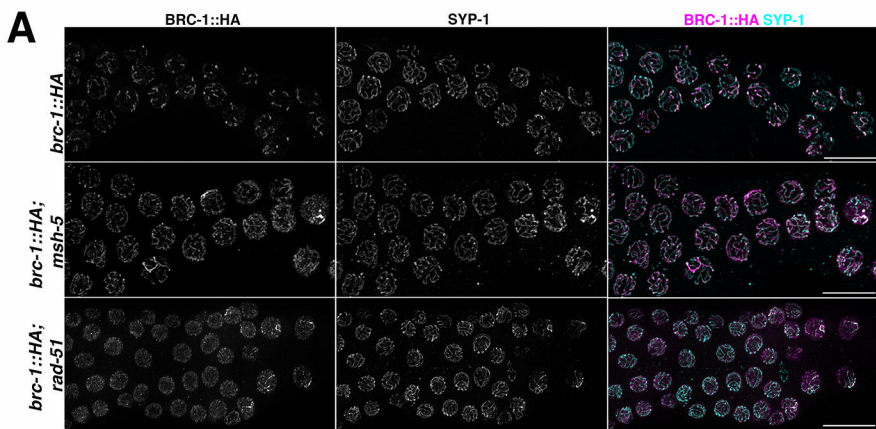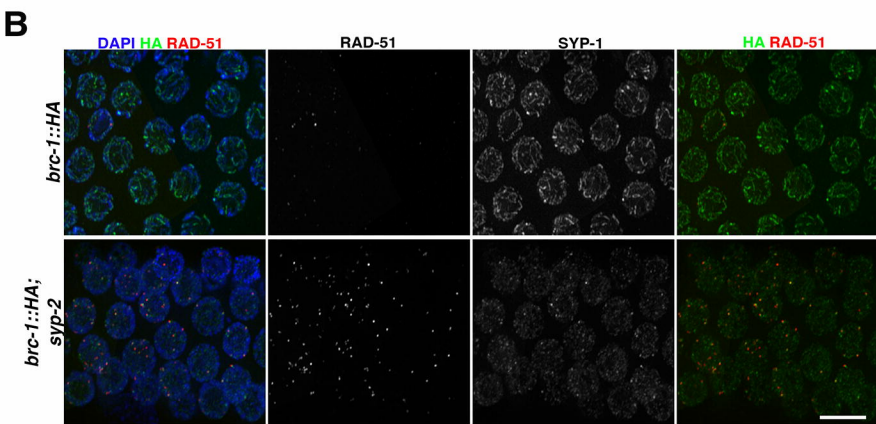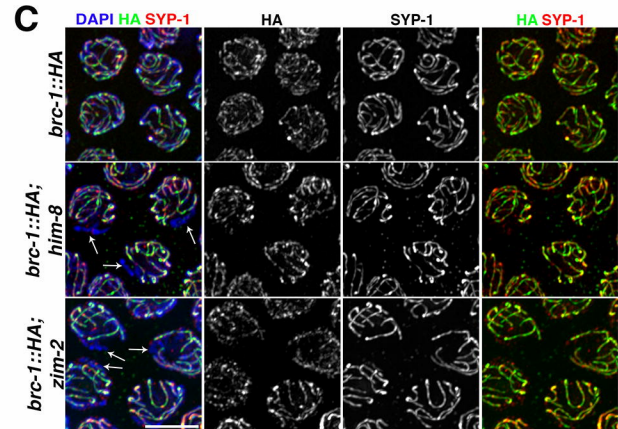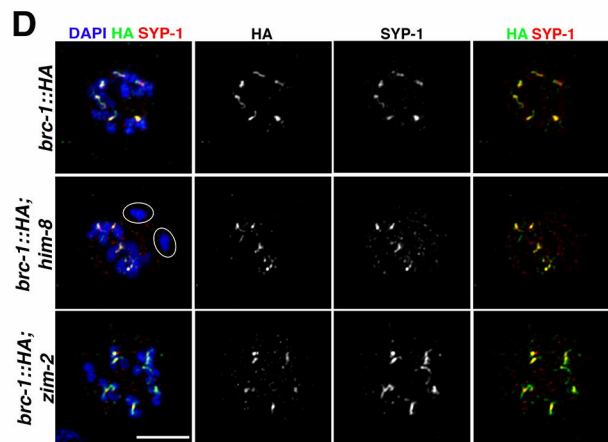



**A**

Quantification of RMH-1, MSH-5 and COSA-1 foci

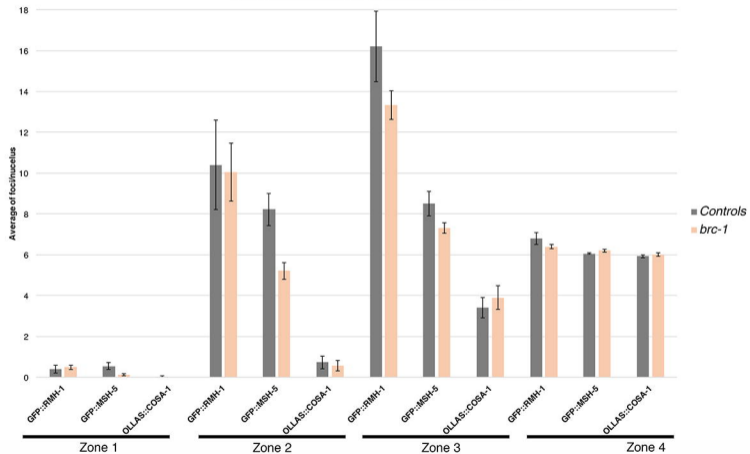**B**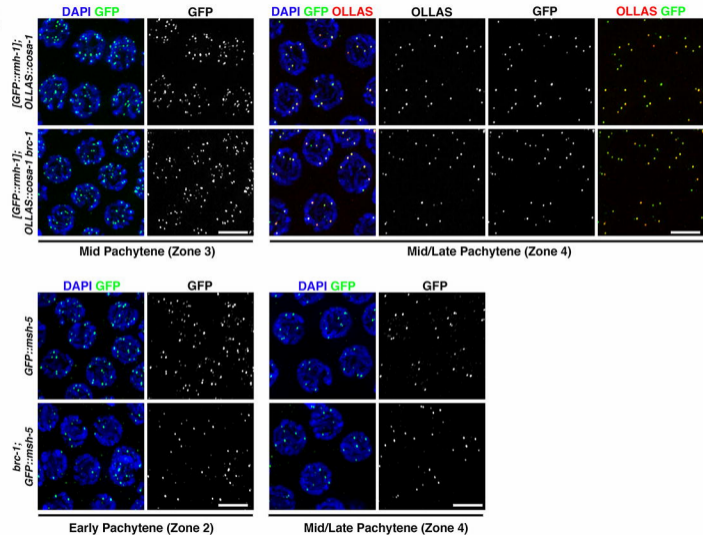

**Quantification of DAPI bodies in diakinesis nuclei**

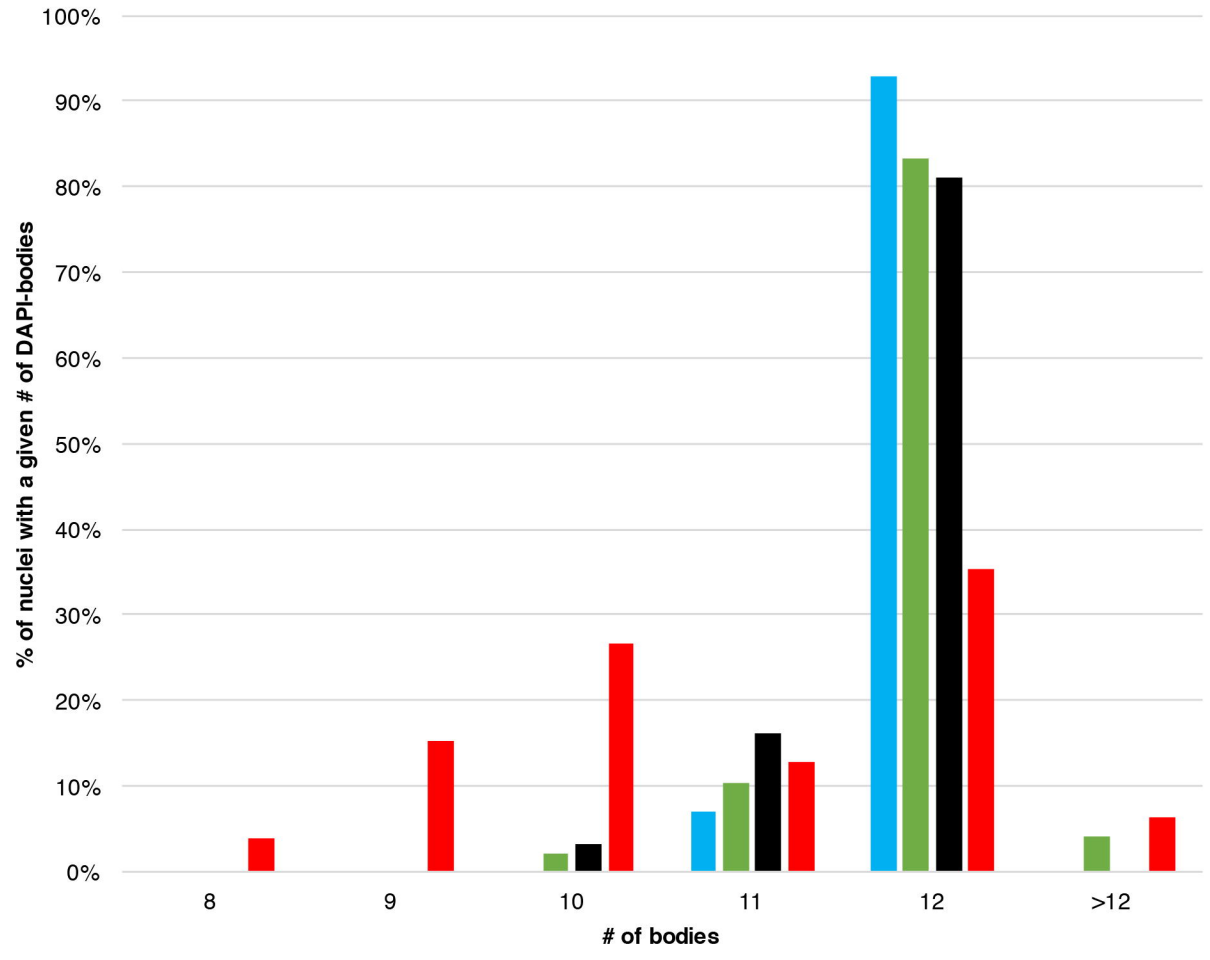

■ *cosa-1*  
 ■ *cosa-1 brc-1*  
 ■ *syp-2*  
 ■ *syp-2; brc-1*

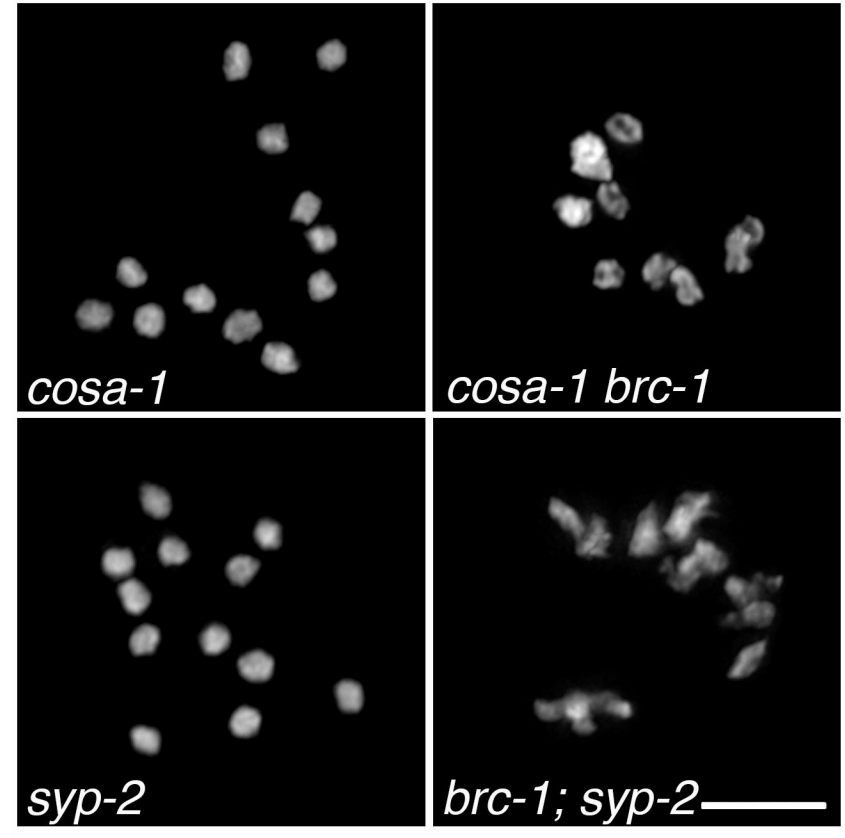

**B**

**Quantification of RAD-51 foci**

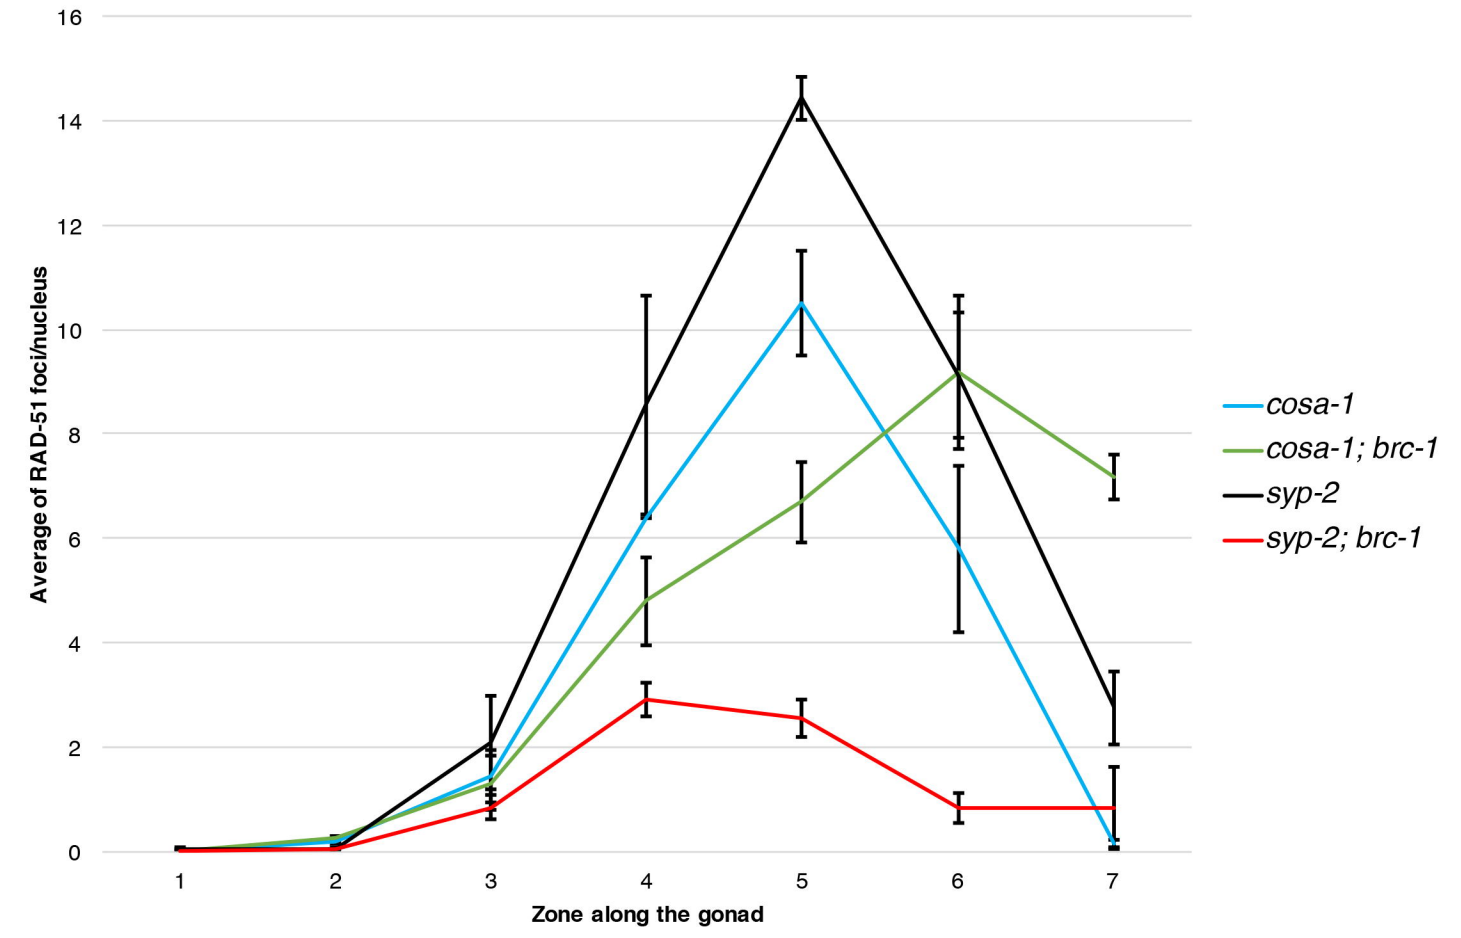

**C**

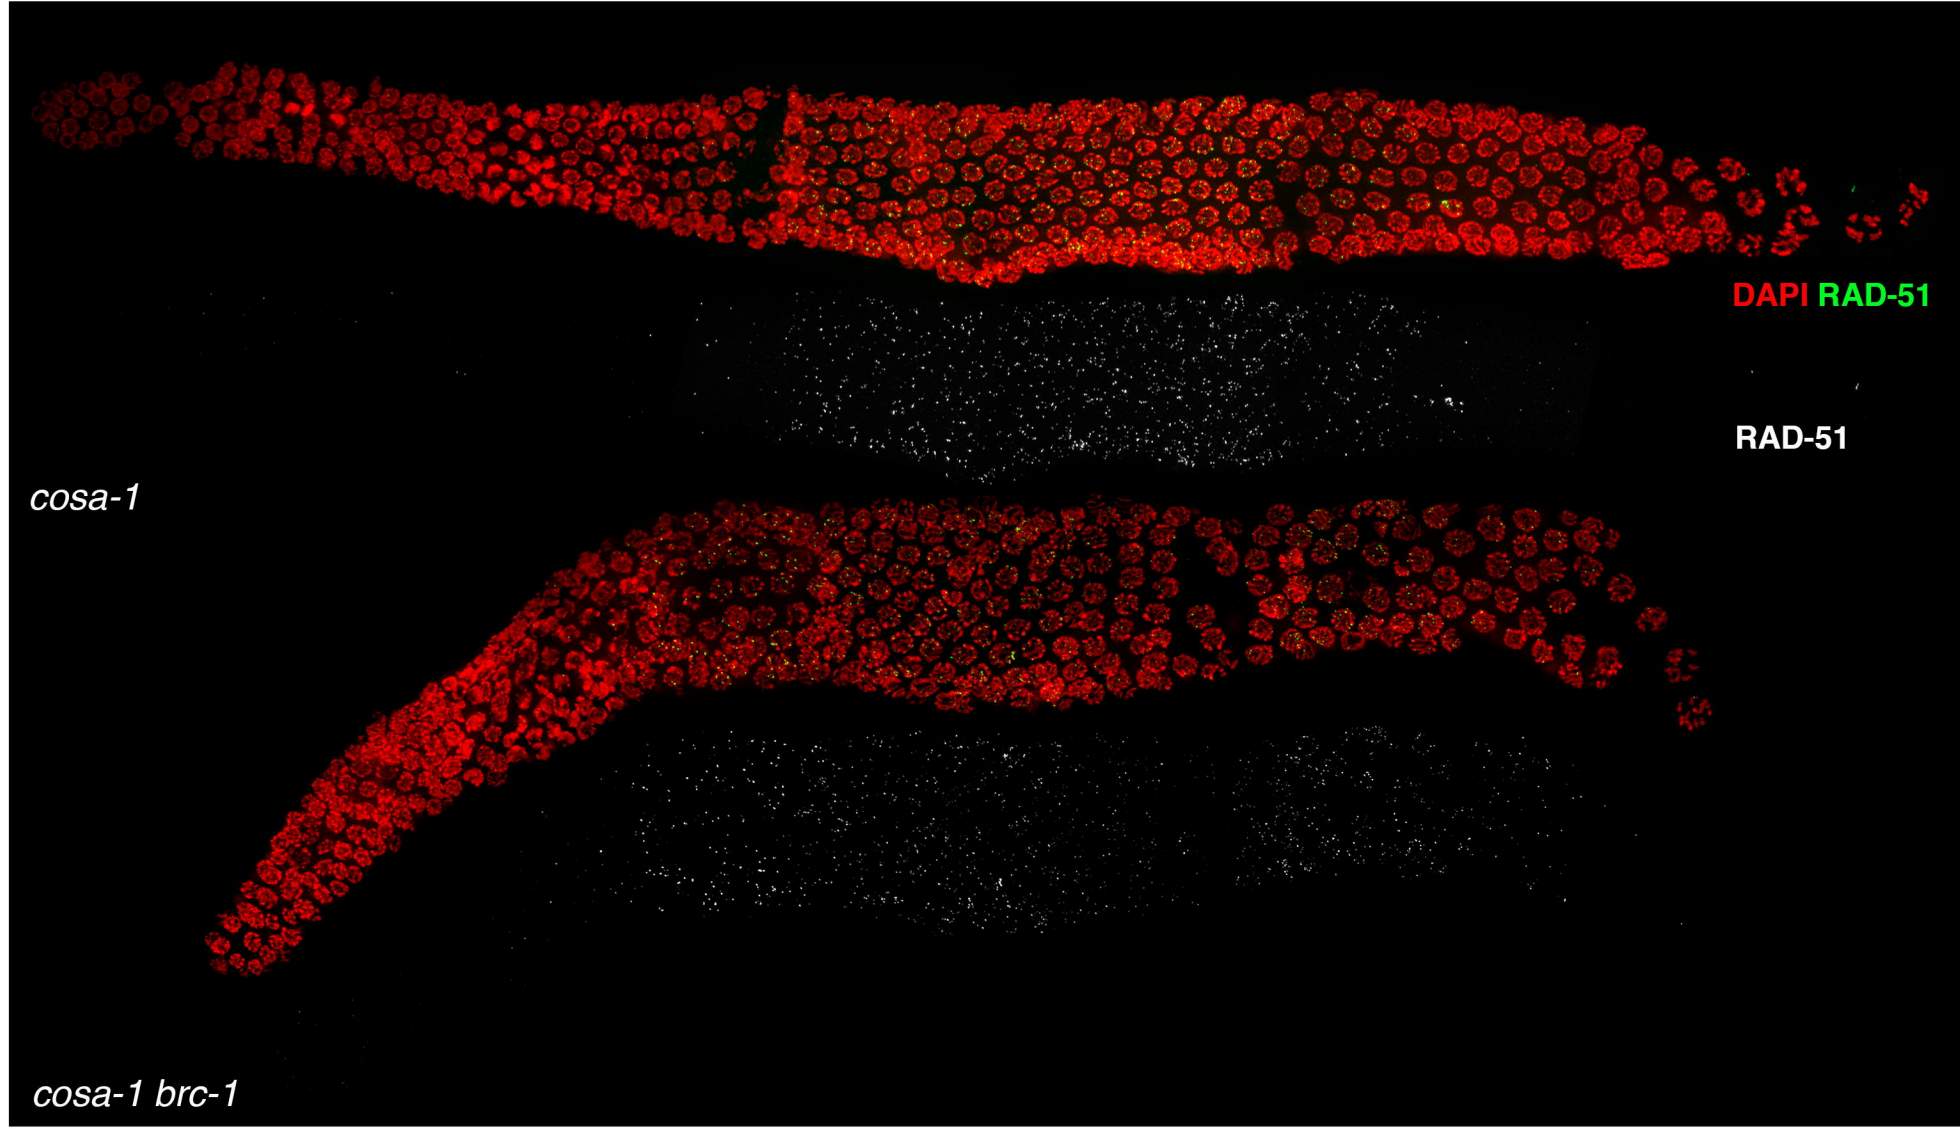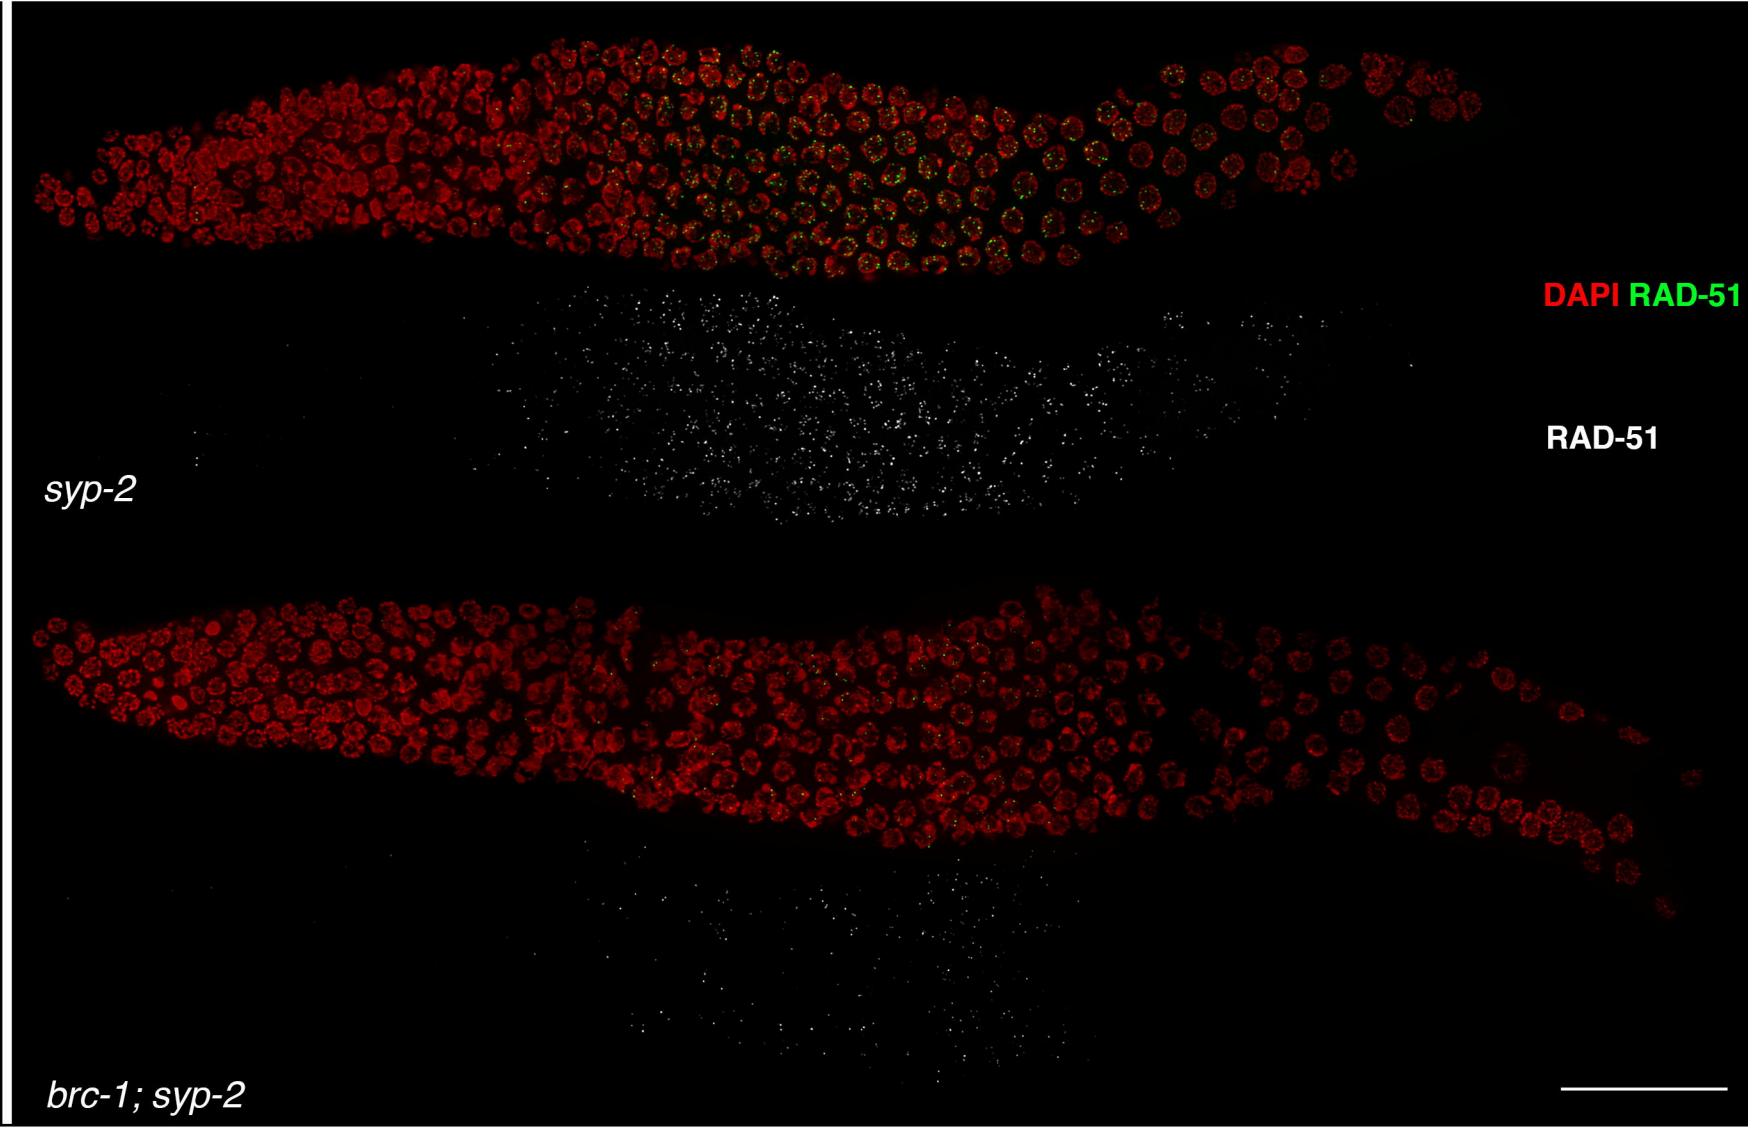

**A***[rpa-1::YFP]**brc-1; [rpa-1::YFP]*

8h post IR

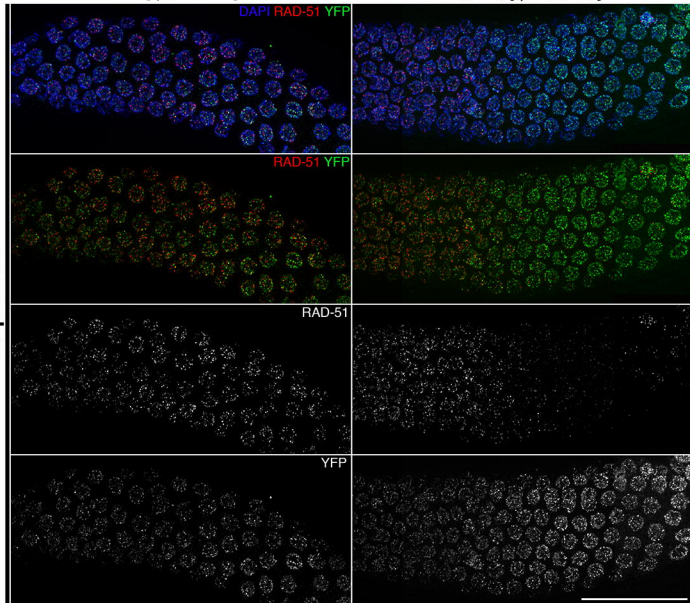**B***[rpa-1::YFP]**brc-1; [rpa-1::YFP]*

24h post IR

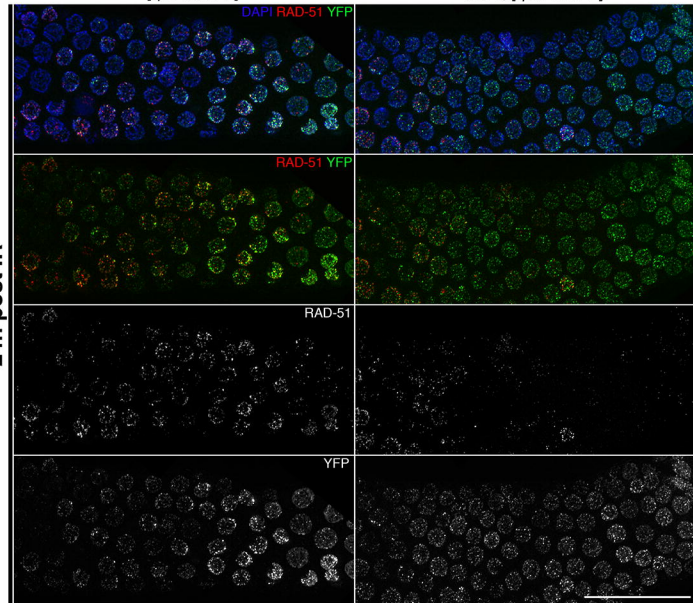

**A**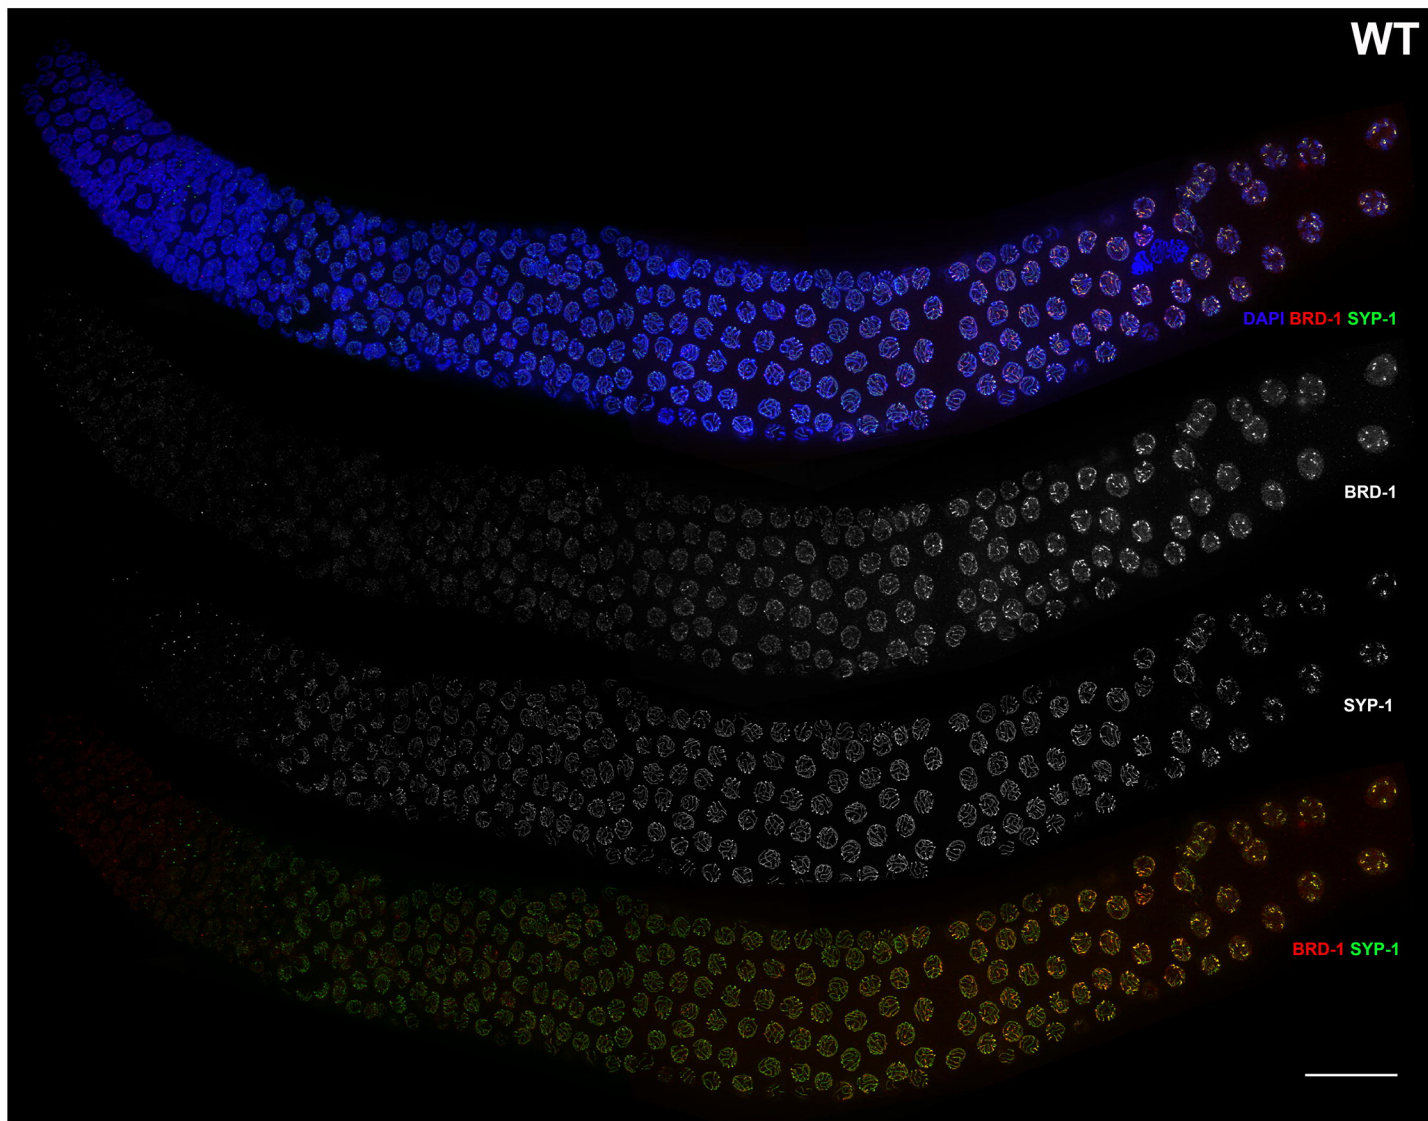**B**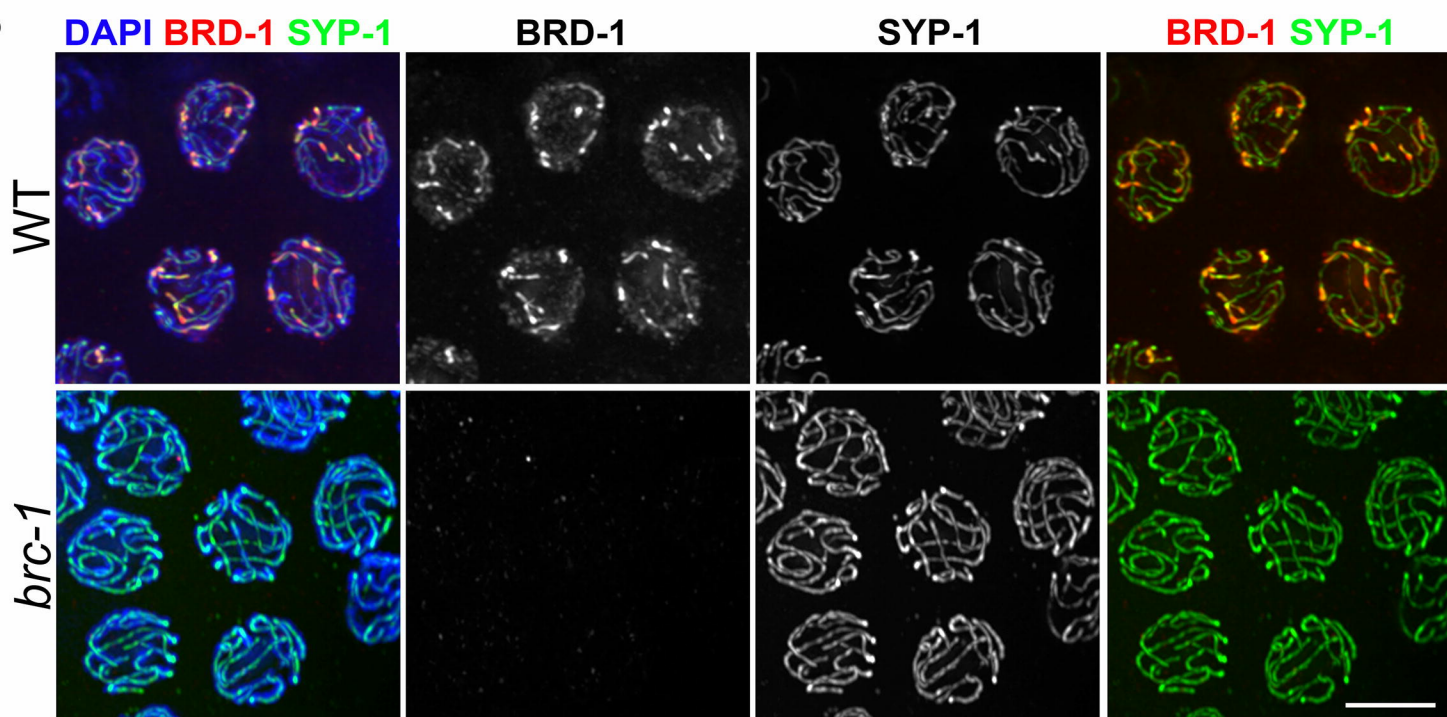

**[GFP::*cosa-1*]**

**BRD-1**

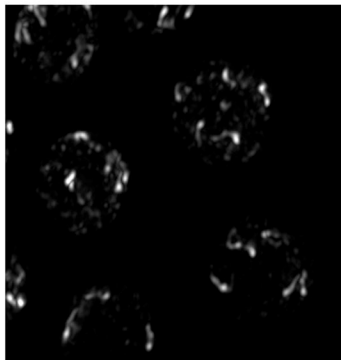

**GFP**

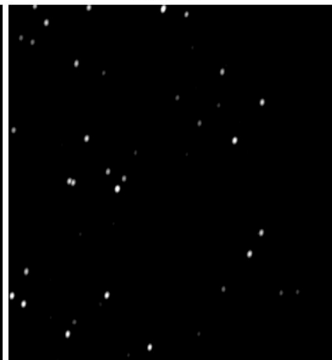

**SYP-1**

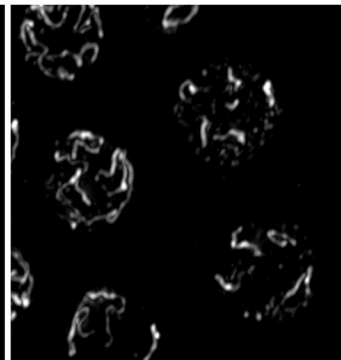

**BRD-1 GFP SYP-1**

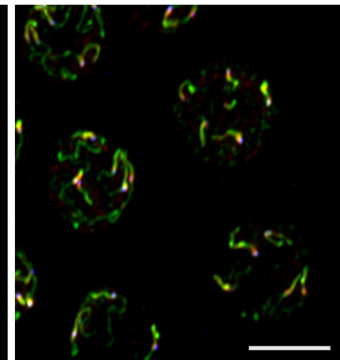

DAPI BRD-1

BRD-1

WT

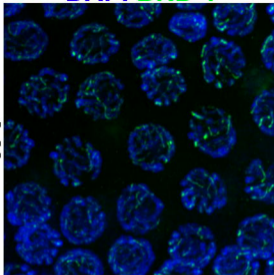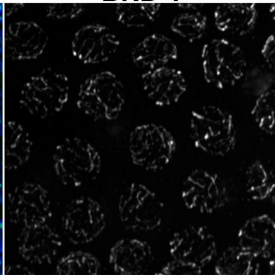

*com-1*

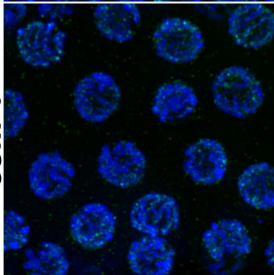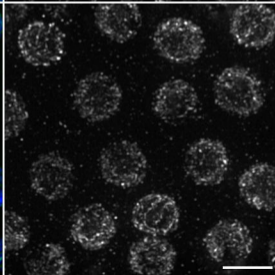

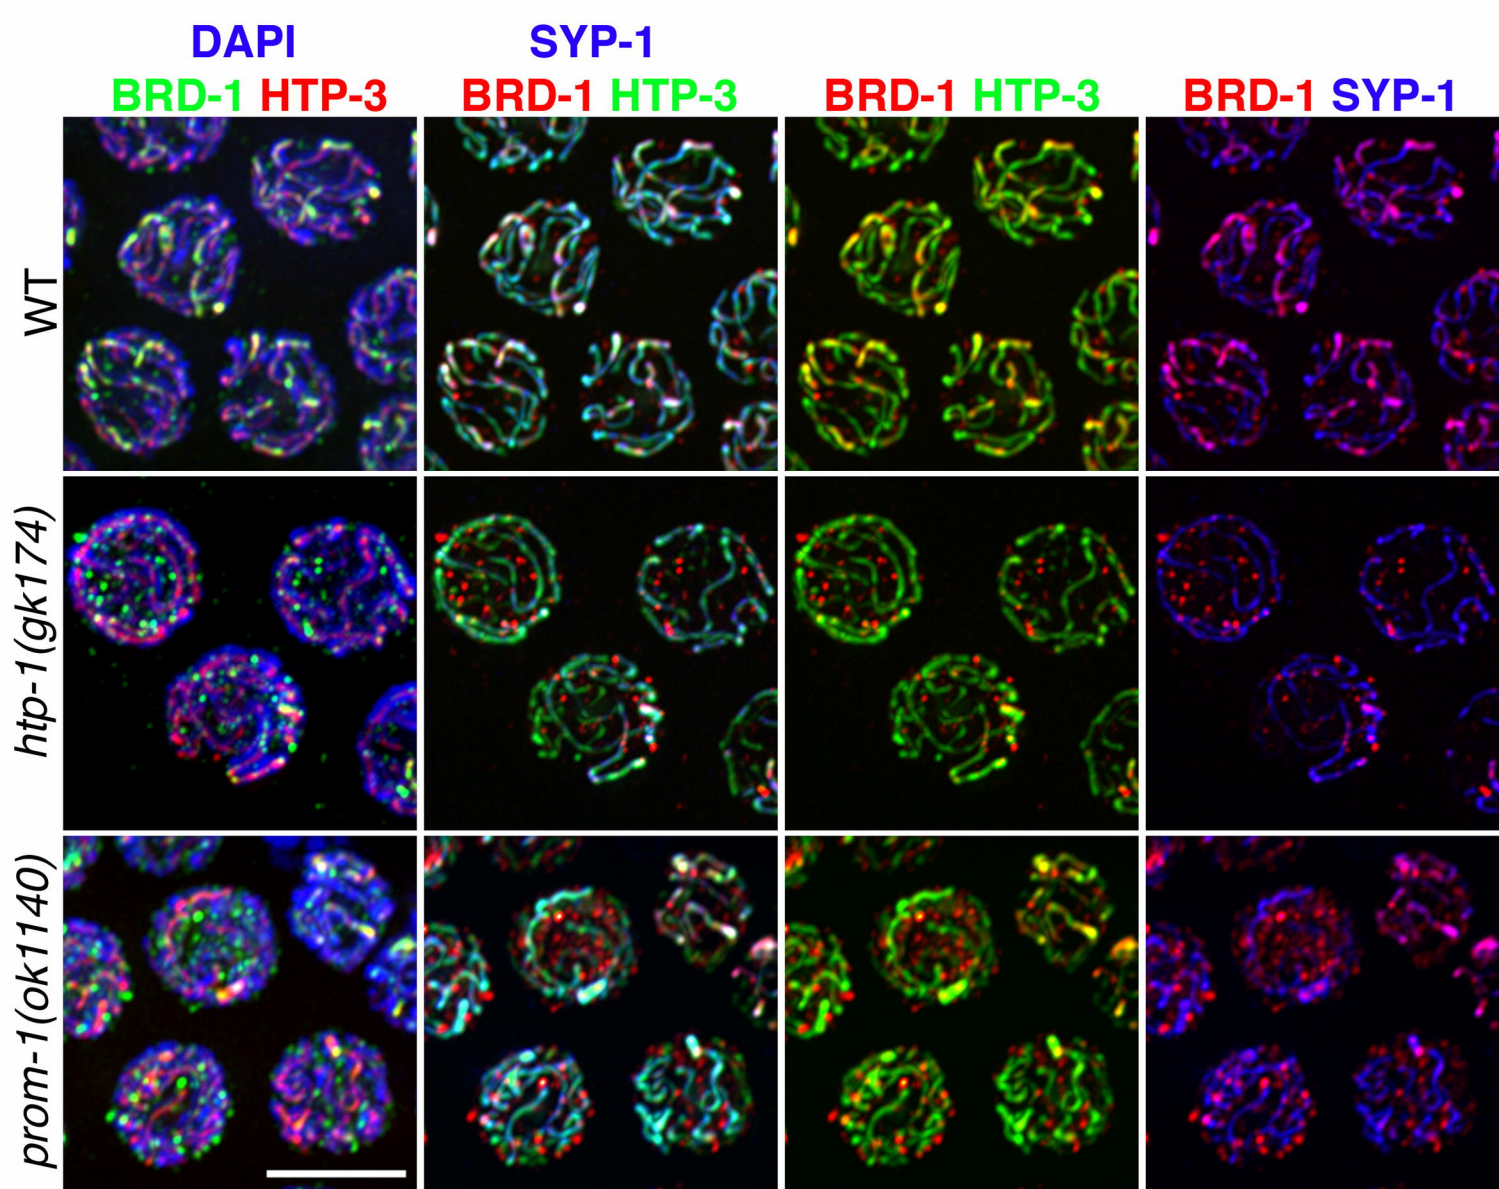

**A**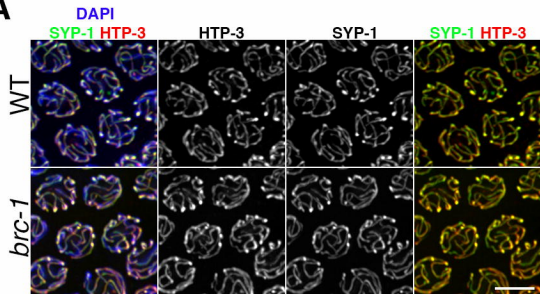**B**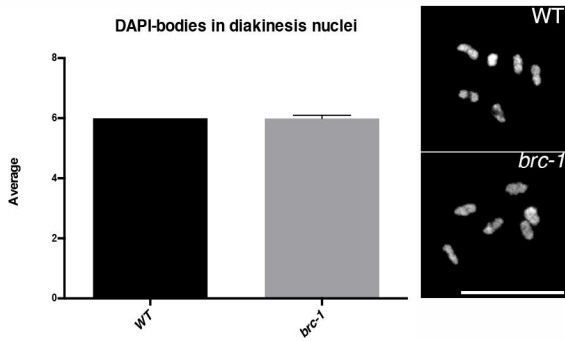**C**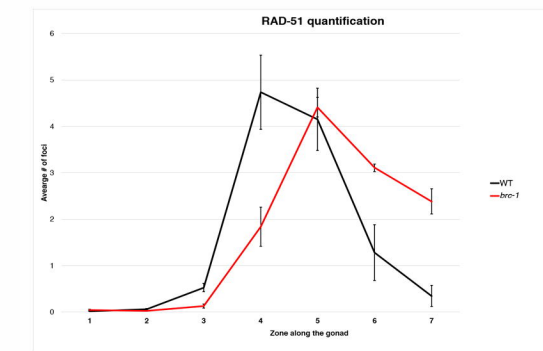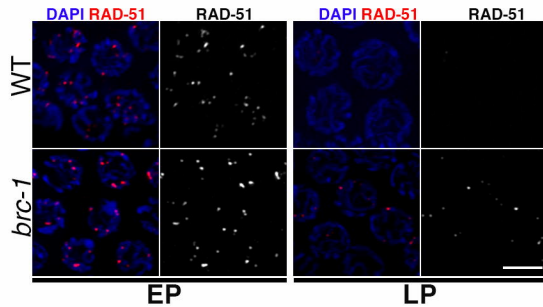



**A**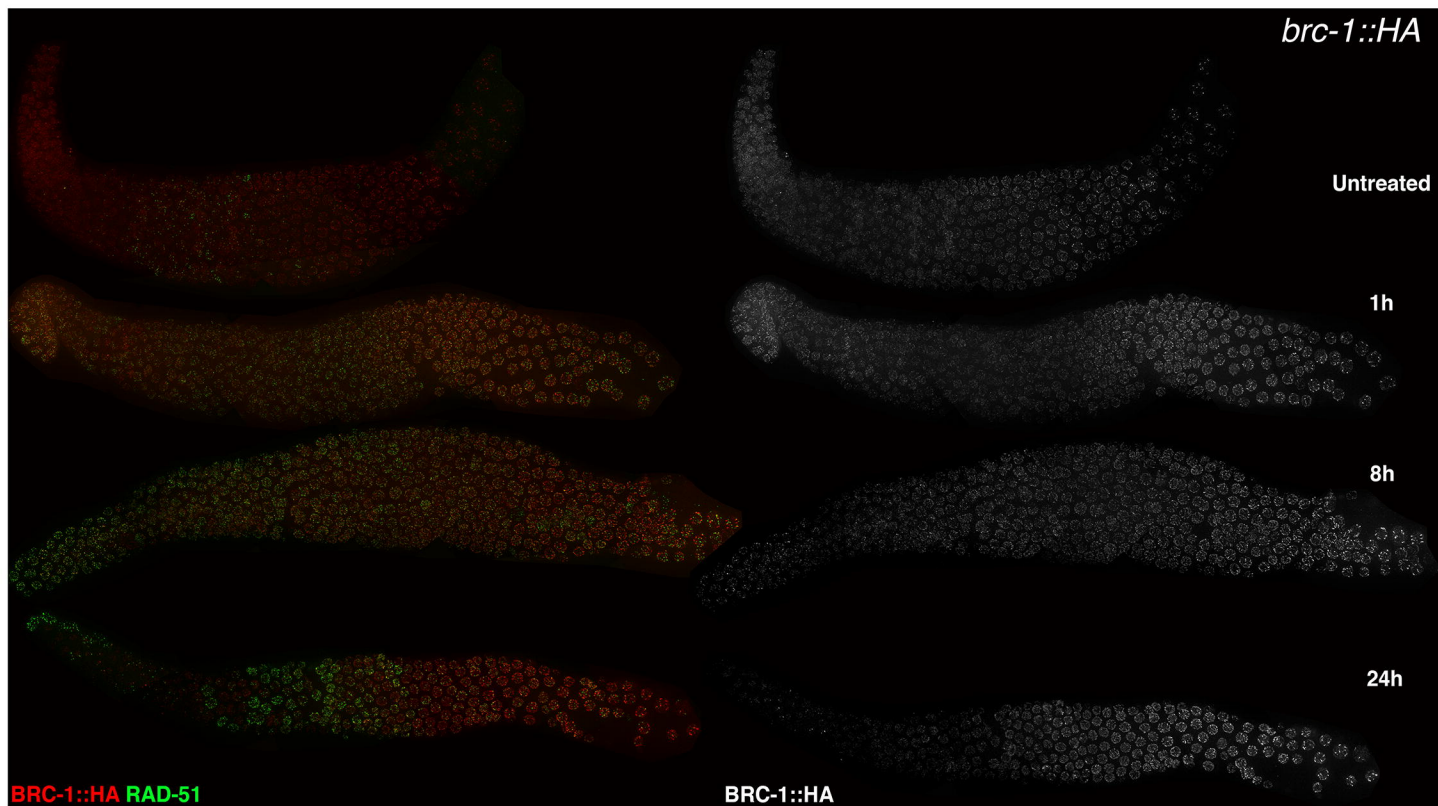**B**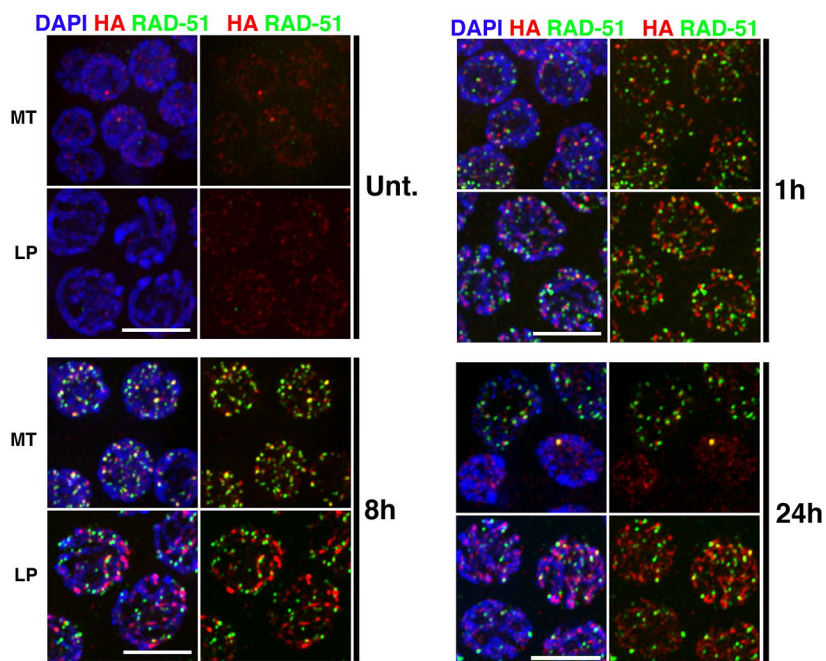**C**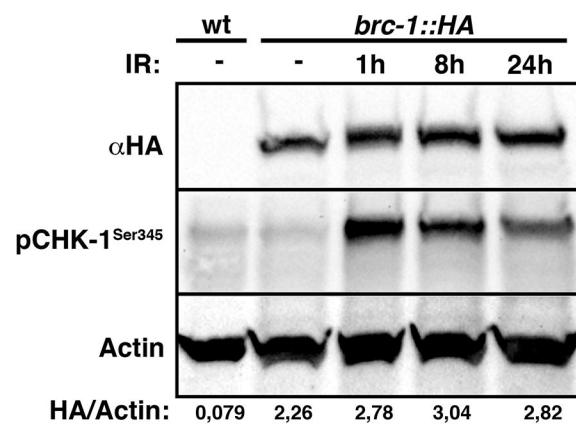

Source: https://www.biorxiv.org/content/10.1101/280214v1.full.pdf
